# Supplementary material for: Selective dorsal rhizotomy in ambulant children with cerebral palsy: an observational cohort study
Source: PubMed Central journal article supplement (PMC7153769; doi:10.1016/s2352-4642(19)30119-1), 2019-07
Supplement: mmc1.pdf [file mmc1.pdf]

# THE LANCET

## Child & Adolescent Health

### Supplementary appendix

This appendix formed part of the original submission and has been peer reviewed. We post it as supplied by the authors.

Supplement to: Summers J, Coker B, Eddy S, et al, for the Selective Dorsal Rhizotomy Steering Committee. Selective dorsal rhizotomy in ambulant children with cerebral palsy: an observational cohort study. *Lancet Child Adolesc Health* 2019; published online April 29. [http://dx.doi.org/10.1016/S2352-4642\(19\)30119-1](http://dx.doi.org/10.1016/S2352-4642(19)30119-1).

# Selective dorsal rhizotomy in ambulant children with cerebral palsy: an observational cohort study

## Supplementary appendix

### Table of contents

#### Page number

|       |                                                                                                                                                                                                                                                                                            |
|-------|--------------------------------------------------------------------------------------------------------------------------------------------------------------------------------------------------------------------------------------------------------------------------------------------|
| 2     | Membership of the Selective dorsal rhizotomy (SDR) Steering Committee and Participating NHS paediatric neurosurgical centres in England, and funding                                                                                                                                       |
| 3-4   | Commissioning criteria for post-operative physiotherapy                                                                                                                                                                                                                                    |
| 5-9   | Literature search criteria, database search terms and PRISMA flowchart:<br>Table S1: Literature search criteria (PICO framework)                                                                                                                                                           |
| 10    | Figure S1: PRISMA flow diagram                                                                                                                                                                                                                                                             |
| 11    | Figure S2: Flow chart of recruitment for SDR                                                                                                                                                                                                                                               |
| 12    | Table S2: Frequency distribution of percentage nerve rootlets cut                                                                                                                                                                                                                          |
| 13    | Figure S3: GMFM-66 individual observed trajectories for GMFCS level II                                                                                                                                                                                                                     |
| 14    | Figure S4: GMFM-66 individual observed trajectories for GMFCS level III                                                                                                                                                                                                                    |
| 15    | Figure S5: GMFM-66 centiles individual observed trajectories for GMFCS level II                                                                                                                                                                                                            |
| 16    | Figure S6: GMFM-66 centiles individual observed trajectories for GMFCS level III                                                                                                                                                                                                           |
| 17    | Table S3: Mean change in GMFM-66 per year associated with SDR and available normative and RCT data                                                                                                                                                                                         |
| 18-19 | Table S4: Secondary outcomes                                                                                                                                                                                                                                                               |
| 20-35 | Systematic review results/study overview:<br>Table S5: Summary of relevant studies and their specific methodologies<br>Figure S7: Cochrane risk of bias<br>Table S6: McLaughlin et al. (2002) <sup>1</sup> outcome summary<br>Table S7: McLaughlin et al. (2002) <sup>1</sup> main results |
| 36    | References                                                                                                                                                                                                                                                                                 |

## **Membership of the Selective dorsal rhizotomy (SDR) Steering Committee**

In addition to the listed authors, the full committee included:

*Clinical/Physiotherapy representatives* - Dr Ram Kumar, Paula Wilkins, Alison Burchell, Dr Guy Atherton, Beth Kershaw-Naylor, Emmanuel Turton, Dr Lucinda Carr, Deepti Chugh, Annabelle Townsend, Helen Navarra, Rajib Lodh, Alec Musson.

*NHS England representatives* - Anthony Prudhoe, Penelope Gray, Janette Harper, Robert Freeman.

*National Institute for Health and Care Excellence representative* – Lee Berry

*Patient representatives* – Sera Johnston, Sorcha Ford.

## **Participating NHS paediatric neurosurgical centres in England**

Alder Hey Children's NHS Foundation Trust

Great Ormond Street Hospital for Children NHS Foundation Trust

Leeds Teaching Hospitals NHS Trust

Nottingham University Hospitals NHS Trust

University Hospitals Bristol NHS Foundation Trust

## **Funding**

This work was undertaken by King's Technology Evaluation Centre (KiTEC; Director Prof S Keevil) in partnership with National Institute for Health and Care Excellence (NICE) and National Health Service (NHS) England. The work of KiTEC was funded by NICE and supported by the National Institute for Health Research (NIHR) Biomedical Research Centre based at Guy's and St Thomas' NHS Foundation Trust and King's College London. Patient treatment costs were funded by NHS England. The views expressed are those of the author(s) and not necessarily those of the NHS, the NIHR or the UK Department of Health. JLP is a National Institute for Health Research (NIHR) Senior Investigator.

## Commissioning criteria for post-operative physiotherapy

The following two boxes are extracted from the appendix of the National Health Service England Commissioning Board's Clinical Commissioning Policy Statement for Selective Dorsal Rhizotomy.<sup>2</sup>

### Appendix 1.

#### Physiotherapy Post Selective Dorsal Rhizotomy

##### Acute Setting

##### Pre-Operative Assessment - Out patient service

1.0 hour OP combined clinic

4.0hrs physiotherapy evaluation including admin/liaison, ROM, MAS, Strength, Function, GMFM, GAIT

0.75 hrs MDT

2.5 hour pre operative assessment (second GMFM/community liaison/combined orthotics appointment)

Total 8.25 therapy hours – 0.22 WTE

##### Post Operative in patient stay

3.5 hrs per day for 15 days. Includes twice daily therapy session,

Any specialist assessments e.g. combined with orthotists/orthopaedic surgeon

Community liaison

Teaching to parents/carers required during the inpatient stay.

Some centres may offer this as an in-patient or outpatient service depending on the setting and stage of the child rehabilitation pathway.

Total - 17.5 hours per patient per week – 0.47 WTE

##### Post Operative Reviews

4 hours - therapy time at 4-6, 12 and 24 months – assessment, video, report and liaison

0.75 hours MDT discussion

Total - 0.14 hours per patient per week – 0.004 WTE

##### Teaching

6 hours per week – 0.16 WTE

#### TOTAL – WTE 0.85

Bandings range from 8a to 3 depending on the level of expertise required at each stage in the pathway.

Recommendations may vary according to each centres surgical technique.

Centre may be able to offer 'intensive' therapy blocks for 2 weeks three times a year to offer expert advise if community providers are unable to offer an increase of therapy post operatively. This will need costing accordingly.

## **Post-operative Physiotherapy for Selective Dorsal Rhizotomy in the Community Setting**

An improvement in GMFM post SDR surgery is dependent on the access to post-operative physiotherapy. The recommendations are for guidance only and local provision may vary according to access to local services and a child's GMFCS level and will require further investigation with community physiotherapy teams.

The below provision will be in **addition** to a child's current local physiotherapy provision e.g. annual assessments for equipment, quarterly orthotic review, orthopaedic assessment, annual lower limb assessment and wheelchair assessment.

### **GMFCS Level II**

☒ Hospital discharge to 4 months post-op: 2 times per week

☒ 4 to 6 months post-op: once per fortnight

☒ 6-12 months: once every 3-4 weeks

☒ 12-24 months post-op: monthly or as required

Therapy time for year one – 47.3 hours per child

Therapy time for year two - 12 hours per child

**Total 0.03 WTE year 1**

**Total 0.006 WTE year 2**

### **GMFCS Level III**

☒ Hospital discharge to 4 months post-op: 3 times per week

☒ 4 to 6 months post-op: once per week

☒ 6-12 months: once per fortnight

☒ 12-24 months post-op: once per 2-4 weeks or as required

Therapy time for year one – 73.1 hours

Therapy time for year two - 25.8 hours

**Total 0.04 WTE year 1**

**Total 0.01 WTE year 2**

Current evidence for children having a pre op intensive therapy programme to improve recovery time post op. Children would benefit from a 6 week block of therapy preoperatively to improve muscle strength.

Therapy teams from UK centres offering SDR in England will review the child at 4-6 months, 12 months and 24 months. Local services may then adjust frequency of intervention based on these recommendations.

Community therapy providers may offer the same amount of therapy but deliver it in offer 'block therapy session' depending on resources available.

### **Equipment Needs**

Post SDR a child is likely to have a drop in function and therefore require access to additional equipment e.g. kaye walker/tripods/standing frame/orthotics.

### **Orthotics**

Post SDR each child will require additional orthotic provision. As these children progress they will require a combined physiotherapy and orthotic review very 3-4 months

## Literature Search Criteria, Database Search Terms & PRISMA flowchart

Table S1: Literature search criteria (PICO framework)

| <b>Inclusion criteria</b> |                                                                                                                                                                                                                                                                                                                                                                                                                                                                                                                                                                                   |
|---------------------------|-----------------------------------------------------------------------------------------------------------------------------------------------------------------------------------------------------------------------------------------------------------------------------------------------------------------------------------------------------------------------------------------------------------------------------------------------------------------------------------------------------------------------------------------------------------------------------------|
| Population                | <p>Individuals with cerebral palsy</p> <p>Subgroups of interest (based on inclusion criteria):</p> <ul style="list-style-type: none"> <li>• Children (3 to 9 years)</li> <li>• Spastic diplegic cerebral palsy</li> <li>• GMFCS level II and III</li> <li>• Dynamic spasticity in lower limbs affecting function and mobility</li> <li>• MRI showing typical cerebral palsy changes and no damage to key areas of brain controlling posture and coordination<sup>1</sup></li> <li>• Mild to moderate lower limb weakness with ability to maintain antigravity postures</li> </ul> |
| Intervention              | Selective dorsal rhizotomy (SDR) (also known as functional posterior rhizotomy [FPR] or selective posterior rhizotomy [SPR])                                                                                                                                                                                                                                                                                                                                                                                                                                                      |
| Comparators               | <p>No treatment</p> <p>Orthopaedic surgery</p> <p>Antispasmodic muscle relaxant:</p> <ul style="list-style-type: none"> <li>• Botulinum toxin (Botox)</li> <li>• Tizanidine</li> </ul> <p>Baclofen (intrathecal pump)</p> <p>Phenol ('nerve deadeners')</p> <p>Other comparators</p>                                                                                                                                                                                                                                                                                              |
| Outcome                   | <ul style="list-style-type: none"> <li>• GMFM-66</li> <li>• GMFM-66 centiles</li> <li>• CP-QoL Child (primary caregiver/parent)</li> <li>• Adverse events</li> <li>• Physiotherapy assessment</li> <li>• Intraoperative assessment (i.e. nerve rootlets cut)</li> <li>• Modified Ashworth Scale (MAS)</li> <li>• Gait</li> </ul>                                                                                                                                                                                                                                                  |
| Language restrictions     | None                                                                                                                                                                                                                                                                                                                                                                                                                                                                                                                                                                              |
| Search dates              | If 1,000+ introduce search date restrictions of 1996+                                                                                                                                                                                                                                                                                                                                                                                                                                                                                                                             |
| <b>Exclusion criteria</b> |                                                                                                                                                                                                                                                                                                                                                                                                                                                                                                                                                                                   |
| Population                | <p>Subgroups of interest for exclusion when identifying comparable population groups:</p> <ul style="list-style-type: none"> <li>• Presence of scoliosis</li> <li>• Presence of hip dislocation (Reimer's index<sup>3</sup> should be &lt;40%)</li> <li>• Dystonia</li> <li>• Genetic or neurological progressive illness</li> <li>• Under 3 years of age, or older than 9 years</li> <li>• GMFCS levels I, IV or V.</li> <li>• Other medical or personal history of interest</li> </ul>                                                                                          |
| Study design              | Non-RCTs                                                                                                                                                                                                                                                                                                                                                                                                                                                                                                                                                                          |

<sup>1</sup>Typical MRI changes are those of white matter damage of immaturity, namely periventricular leukomalacia (PVL). Lesions in basal ganglia or cerebellum are contra-indications, since they are associated with other cerebral palsy types (dyskinetic/ataxia).

## Database Search Terms

### Cochrane Libraries

A Cochrane protocol for 'selective dorsal rhizotomy in the management of children with spastic cerebral palsy' is referred to in NICE's IP document <sup>4</sup>. However, the protocol referred to has been withdrawn from the Cochrane website (site accessed 11<sup>th</sup> April 2018). KITEC sought clarification from Cochrane and the author(s). Cochrane replied: *'The protocol "Selective dorsal rhizotomy in the management of children with spastic cerebral palsy" was published in 2008 but the authors never move forward with the completed review. So, it was withdrawn by the Review Group in 2013, and then removed by the system.'* This was in accordance with Cochrane policy.

Search date 15<sup>th</sup> October 2018

| ID  | Search                                          | Hits    |
|-----|-------------------------------------------------|---------|
| #1  | cerebral palsy                                  | 2,867   |
| #2  | cerebral pals*                                  | 2,899   |
| #3  | little*                                         | 29,145  |
| #4  | CP                                              | 9,673   |
| #5  | spastic*                                        | 1,893   |
| #6  | spastic diplegi*                                | 199     |
| #7  | spastic quadriplegi*                            | 71      |
| #8  | spastic hemiplegi*                              | 220     |
| #9  | spastic monoplegi*                              | 4       |
| #10 | rhizo*                                          | 481     |
| #11 | sensory nerve root* interrup*                   | 15      |
| #12 | ((function* or posterior or dorsal) adj rhizo*) | 26      |
| #13 | sensory root* rhizo*                            | 7       |
| #14 | sensory nerve root* rhizo*                      | 5       |
| #15 | sdr                                             | 225     |
| #16 | 1 or 2 or 3 or 4 or 5 or 6 or 7 or 8 or 9       | 42,133  |
| #17 | 10 or 11 or 12 or 13 or 14 or 15                | 711     |
| #18 | 16 and 17                                       | 135     |
| #19 | "trial":ti                                      | 226,857 |
| #20 | 18 and 19                                       | 11      |

## Embase

Search date 15<sup>th</sup> October 2018

Embase 1974 to 2018 Week 42

Ovid MEDLINE(R) Epub Ahead of Print, In-Process & Other Non-Indexed Citations, Ovid MEDLINE(R)

Daily and Ovid MEDLINE(R) 1946 to Present

Global Health 1973 to 2018 Week 40

HMIC Health Management Information Consortium 1979 to July 2018

Maternity & Infant Care Database (MIDIRS) 1971 to August 2018

| ID  | Search                                             | Hits      |
|-----|----------------------------------------------------|-----------|
| #1  | cerebral palsy.mp                                  | 63,732    |
| #2  | cerebral pals*.mp                                  | 63,820    |
| #3  | little*.mp                                         | 1,287,703 |
| #4  | CP.mp                                              | 124,062   |
| #5  | spastic*.mp                                        | 70,369    |
| #6  | spastic diplegi*.mp                                | 2,838     |
| #7  | spastic quadriplegi*.mp                            | 1,371     |
| #8  | spastic hemiplegi*.mp                              | 1,162     |
| #9  | spastic monoplegi*.mp                              | 13        |
| #10 | rhizo*.mp                                          | 125,449   |
| #11 | sensory nerve root* interrup*.mp                   | 0         |
| #12 | ((function* or posterior or dorsal) adj rhizo*).mp | 2,583     |
| #13 | sensory root* rhizo*.mp                            | 3         |
| #14 | sensory nerve root* rhizo*.mp                      | 0         |
| #15 | sdr.mp                                             | 4,037     |
| #16 | 1 or 2 or 3 or 4 or 5 or 6 or 7 or 8 or 9          | 1,511,276 |
| #17 | 10 or 11 or 12 or 13 or 14 or 15                   | 129,091   |
| #18 | 16 and 17                                          | 4,991     |
| #19 | trial.m_titl                                       | 476,548   |
| #20 | 18 and 19                                          | 11        |

## Pubmed

Search date 15<sup>th</sup> October 2018

| ID | Search                | Hits    |
|----|-----------------------|---------|
| #1 | Search cerebral palsy | 27,814  |
| #2 | Search cerebral pals* | 25,295  |
| #3 | Search little*        | 572,330 |
| #4 | Search CP             | 68,472  |



|     |                                                                                                                                                                                                                                                                                                                                                                  |         |
|-----|------------------------------------------------------------------------------------------------------------------------------------------------------------------------------------------------------------------------------------------------------------------------------------------------------------------------------------------------------------------|---------|
| #5  | Search spastic*                                                                                                                                                                                                                                                                                                                                                  | 26,401  |
| #6  | Search spastic diplegi*                                                                                                                                                                                                                                                                                                                                          | 1,164   |
| #7  | Search spastic quadriplegi*                                                                                                                                                                                                                                                                                                                                      | 541     |
| #8  | Search spastic hemiplegi*                                                                                                                                                                                                                                                                                                                                        | 492     |
| #9  | Search spastic monoplegi*                                                                                                                                                                                                                                                                                                                                        | 3       |
| #10 | Search rhizo*                                                                                                                                                                                                                                                                                                                                                    | 42,293  |
| #11 | Search sensory nerve root* interrup*                                                                                                                                                                                                                                                                                                                             | 0       |
| #12 | Search ((function* or posterior or dorsal)) AND rhizo*                                                                                                                                                                                                                                                                                                           | 6,283   |
| #13 | Search sensory root* rhizo*                                                                                                                                                                                                                                                                                                                                      | 1       |
| #14 | Search sensory nerve root* rhizo*                                                                                                                                                                                                                                                                                                                                | 0       |
| #15 | Search sdr                                                                                                                                                                                                                                                                                                                                                       | 2,709   |
| #16 | Search (((((((cerebral palsy) OR cerebral pals*) OR cp) OR spastic*) OR spastic diplegi*) OR spastic quadriplegi*) OR spastic hemiplegi*) OR spastic monoplegi*                                                                                                                                                                                                  | 111,845 |
| #17 | Search (((((rhizo*) OR sensory nerve root* interrup*) OR (((function* or posterior or dorsal)) AND rhizo*)) OR sensory root* rhizo*) OR sensory nerve root* rhizo*) OR sdr                                                                                                                                                                                       | 9,054   |
| #18 | Search (((((((rhizo*) OR sensory nerve root* interrup*) OR (((function* or posterior or dorsal)) AND rhizo*)) OR sensory root* rhizo*) OR sensory nerve root* rhizo*) OR sdr)) AND (((((((cerebral palsy) OR cerebral pals*) OR cp) OR spastic*) OR spastic diplegi*) OR spastic quadriplegi*) OR spastic hemiplegi*) OR spastic monoplegi*                      | 186     |
| #19 | Search trial[Title]                                                                                                                                                                                                                                                                                                                                              | 188,406 |
| #20 | Search (trial[Title]) AND (((((((rhizo*) OR sensory nerve root* interrup*) OR (((function* or posterior or dorsal)) AND rhizo*)) OR sensory root* rhizo*) OR sensory nerve root* rhizo*) OR sdr)) AND (((((((cerebral palsy) OR cerebral pals*) OR cp) OR spastic*) OR spastic diplegi*) OR spastic quadriplegi*) OR spastic hemiplegi*) OR spastic monoplegi*)) | 1       |

## Web of Science

Search date 15<sup>th</sup> October 2018

| ID  | Search                                              | Hits      |
|-----|-----------------------------------------------------|-----------|
| #1  | ts=(cerebral palsy)                                 | 46,297    |
| #2  | ts=(cerebral palsy*)                                | 45,971    |
| #3  | ts=(little*)                                        | 1,113,605 |
| #4  | ts=(cp)                                             | 158,827   |
| #5  | ts=(spastic*)                                       | 43,633    |
| #6  | ts=(spastic diplegi*)                               | 2,398     |
| #7  | ts=(spastic quadriplegi*)                           | 1,313     |
| #8  | ts=(spastic hemiplegi*)                             | 1,955     |
| #9  | ts=(spastic monoplegi*)                             | 24        |
| #10 | ts=(rhizo*)                                         | 220,134   |
| #11 | ts=(sensory nerve root* interrupt*)                 | 121       |
| #12 | ts=((function* or posterior or dorsal) NEAR rhizo*) | 4,913     |

|     |                                                    |           |
|-----|----------------------------------------------------|-----------|
| #13 | ts=(sensory root* rhizo*)                          | 619       |
| #14 | ts=(sensory nerve root* rhizo*)                    | 451       |
| #15 | ts=(sdr)                                           | 7,578     |
| #16 | #9 OR #8 OR #7 OR #6 OR #5 OR #4 OR #3 OR #2 OR #1 | 1,342,643 |
| #17 | #15 OR #14 OR #13 OR #12 OR #11 OR #10             | 227,655   |
| #18 | #17 AND #16                                        | 8,471     |
| #19 | TI=(trial)                                         | 433,290   |
| #20 | #19 AND #18                                        | 27        |

### Grey Literature

Search date 15<sup>th</sup> October 2018: the following sites: [www.greylit.org/](http://www.greylit.org/), [www.opengrey.eu/](http://www.opengrey.eu/),  
<http://oaister.worldcat.org/>, [ntrl.ntis.gov/NTRL/](http://ntrl.ntis.gov/NTRL/). No ongoing trials for SDR were identified.

Figure S1: PRISMA Flow Diagram<sup>5</sup>

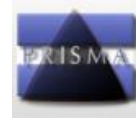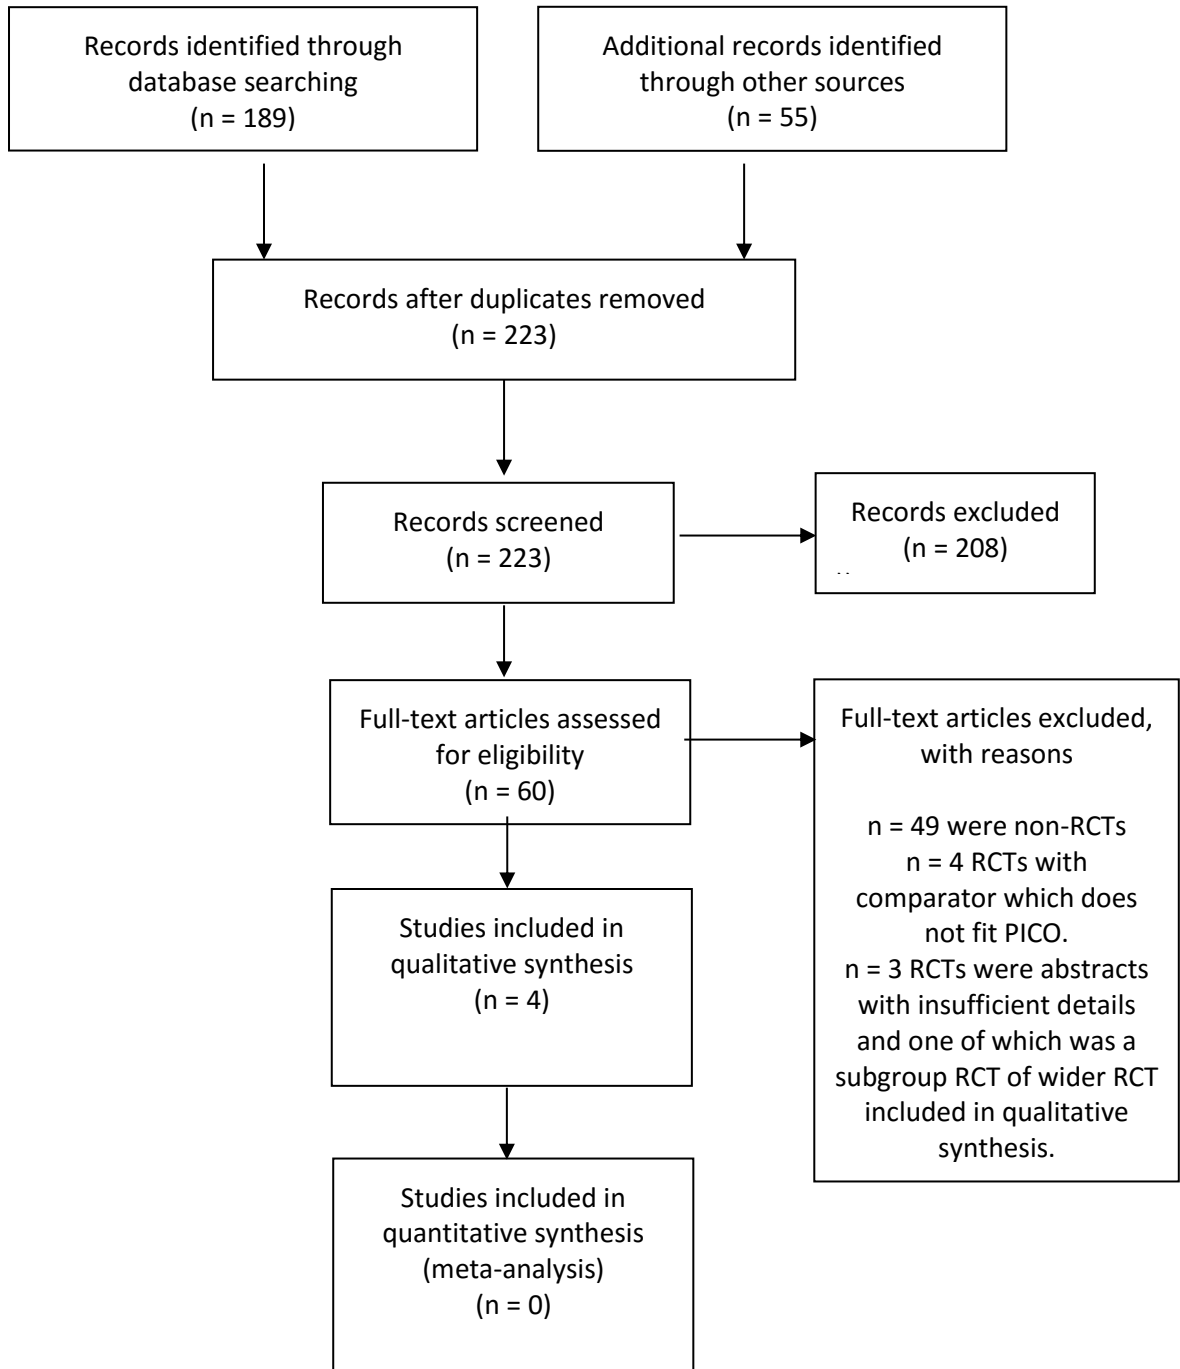

**Figure S2: Flow chart of recruitment for SDR**

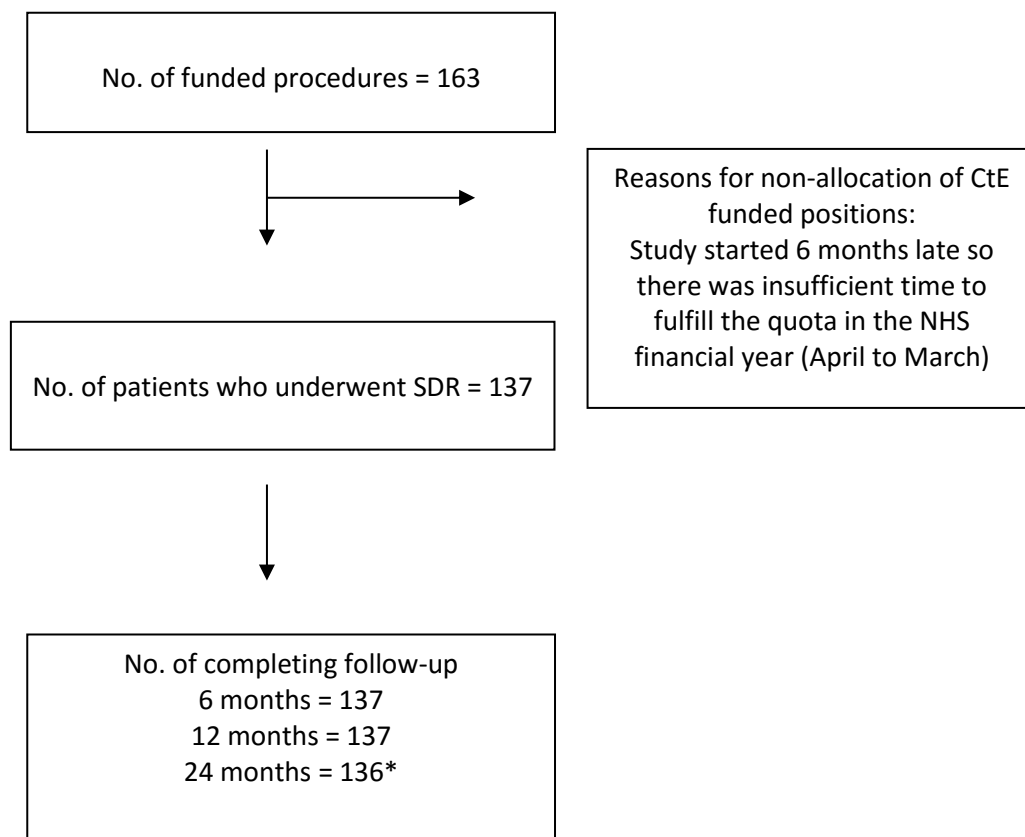

\* One patient confirmed as lost-to-follow up at 24-month assessment.

**Table S2: Frequency distribution of percentage nerve rootlets cut**

| <b>Nerve rootlet</b> | <b>0%</b> | <b>1% to &lt;50%</b> | <b>50% to &lt;60%</b> | <b>60% to &lt;70%</b> | <b>70% to &lt;100%*</b> | <b>Total no. patients with &gt;0% cut</b> | <b>Total no. patients</b> |
|----------------------|-----------|----------------------|-----------------------|-----------------------|-------------------------|-------------------------------------------|---------------------------|
| L1 left              | 19        | 0                    | 30                    | 76                    | 0                       | 106                                       | 125                       |
| L1 right             | 19        | 0                    | 29                    | 77                    | 0                       | 106                                       | 125                       |
| L2 left              | 0         | 2                    | 8                     | 124                   | 3                       | 137                                       | 137                       |
| L2 right             | 0         | 3                    | 8                     | 125                   | 1                       | 137                                       | 137                       |
| L3 left              | 0         | 1                    | 14                    | 121                   | 1                       | 137                                       | 137                       |
| L3 right             | 0         | 1                    | 9                     | 127                   | 0                       | 137                                       | 137                       |
| L4 left              | 0         | 0                    | 10                    | 126                   | 1                       | 137                                       | 137                       |
| L4 right             | 1         | 2                    | 12                    | 118                   | 4                       | 136                                       | 137                       |
| L5 left              | 0         | 2                    | 13                    | 81                    | 41                      | 137                                       | 137                       |
| L5 right             | 0         | 2                    | 9                     | 85                    | 41                      | 137                                       | 137                       |
| S1 left              | 3         | 5                    | 7                     | 77                    | 45                      | 134                                       | 137                       |
| S1 right             | 3         | 2                    | 13                    | 74                    | 45                      | 134                                       | 137                       |

\*No nerve rootlets were recorded with 100% cut.

Figure S3: GMFM-66 individual observed trajectories for GMFCS level II<sup>6</sup>

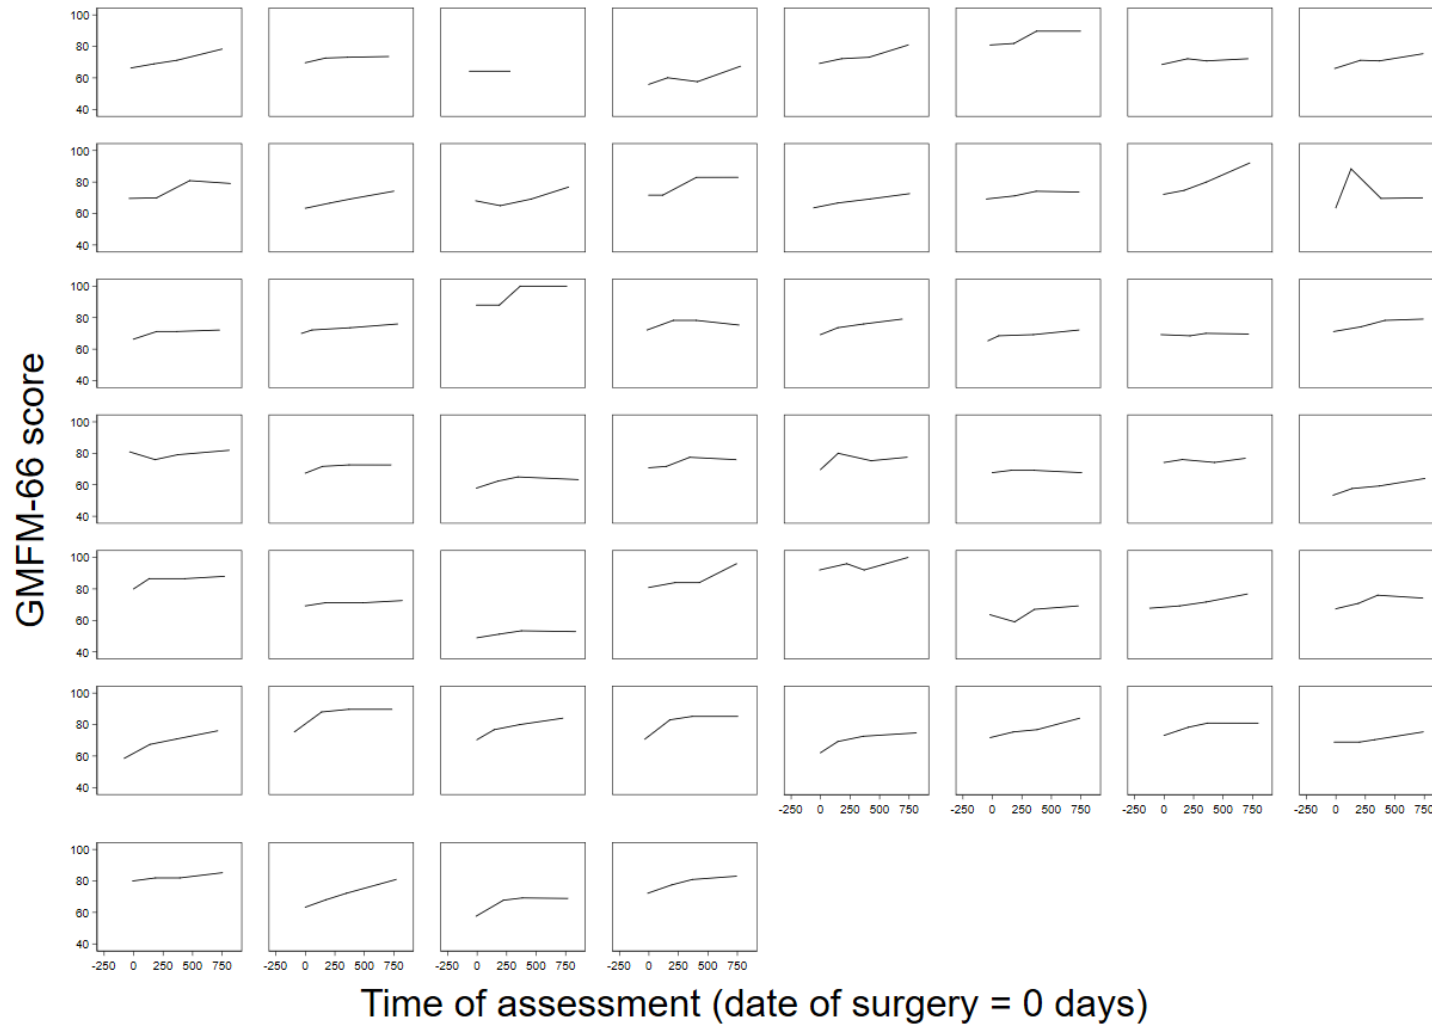

Figure S4: GMFM-66 individual observed trajectories for GMFCS level III

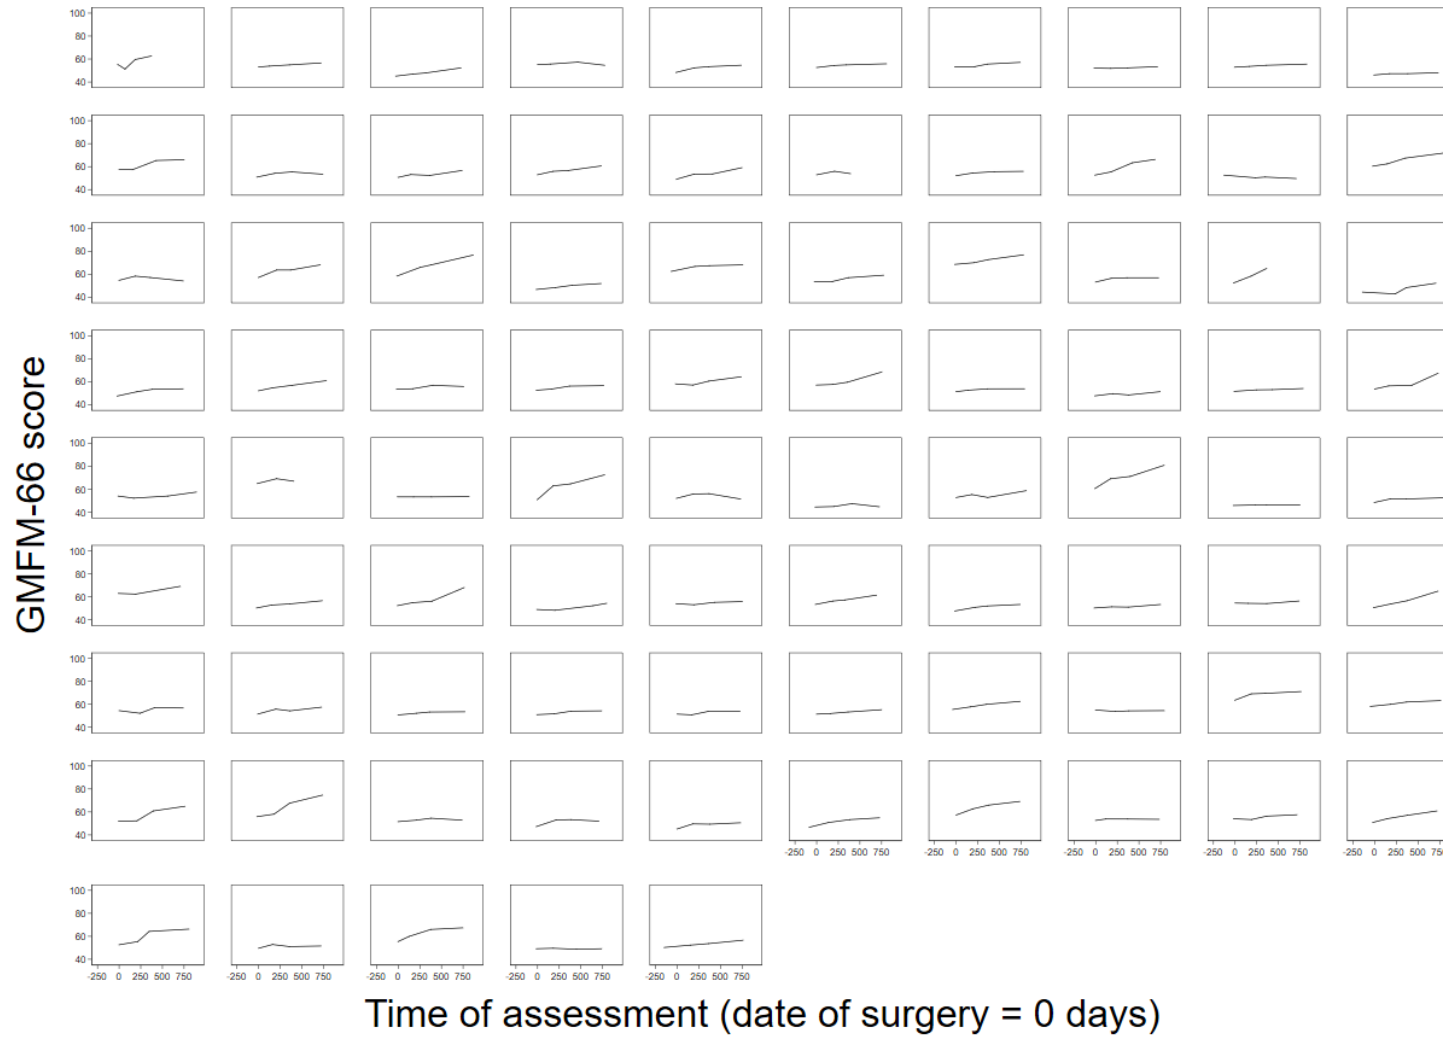

Figure S5: GMFM-66 centile individual observed trajectories for GMFCS level II

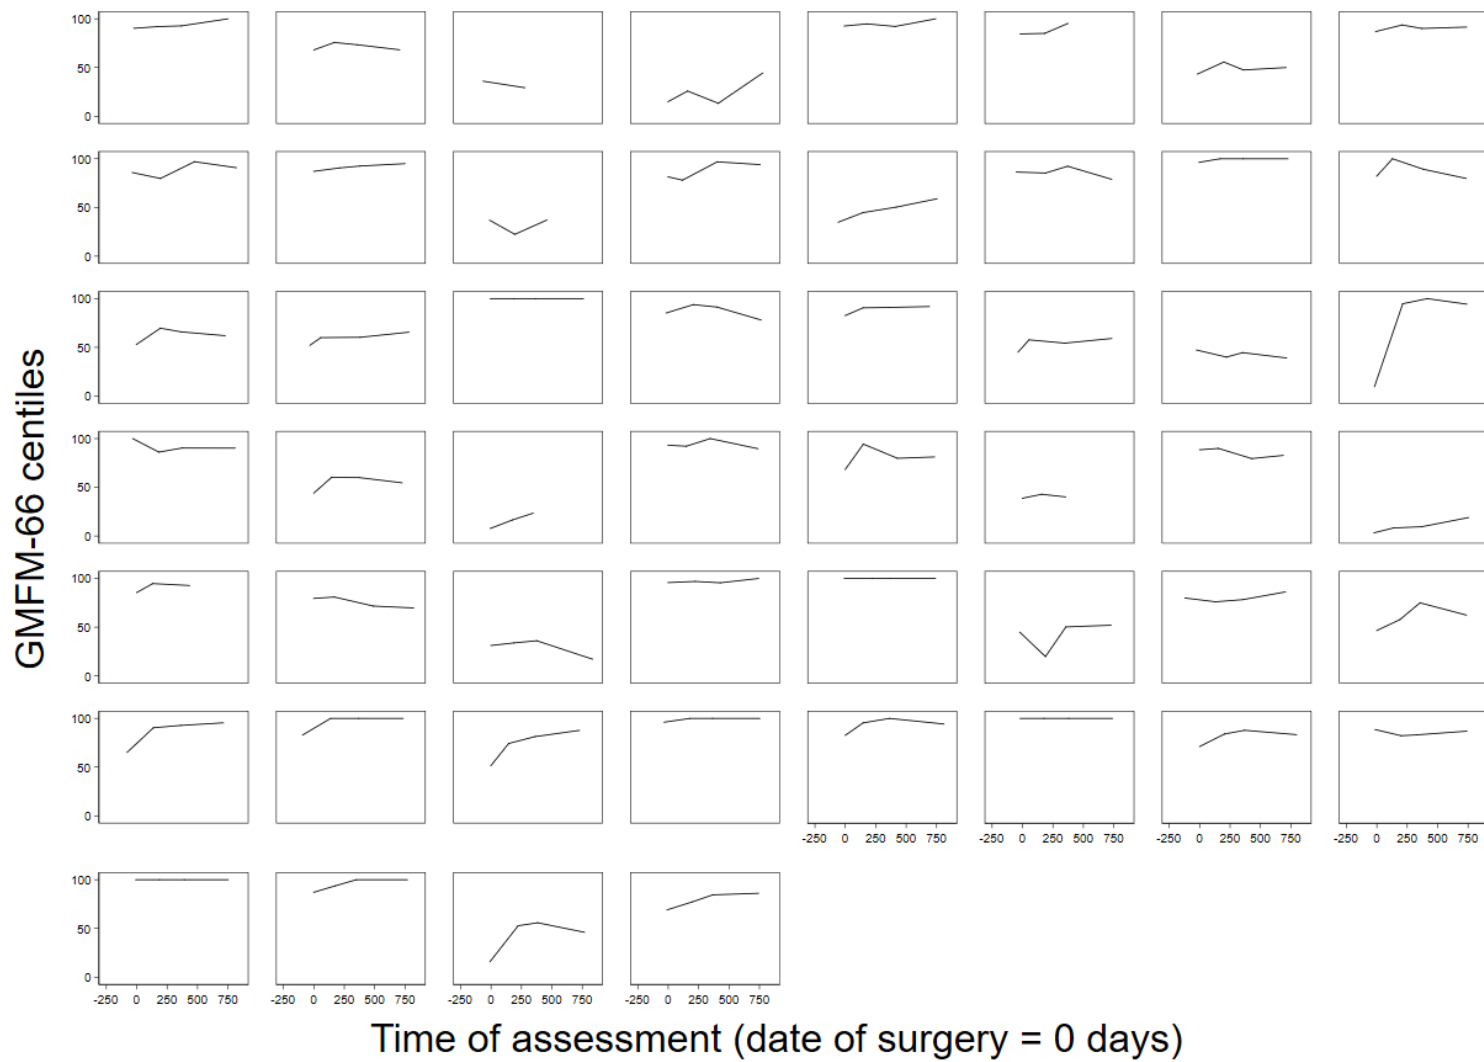



Figure S6: GMFM-66 centiles individual observed trajectories for GMFCS level III

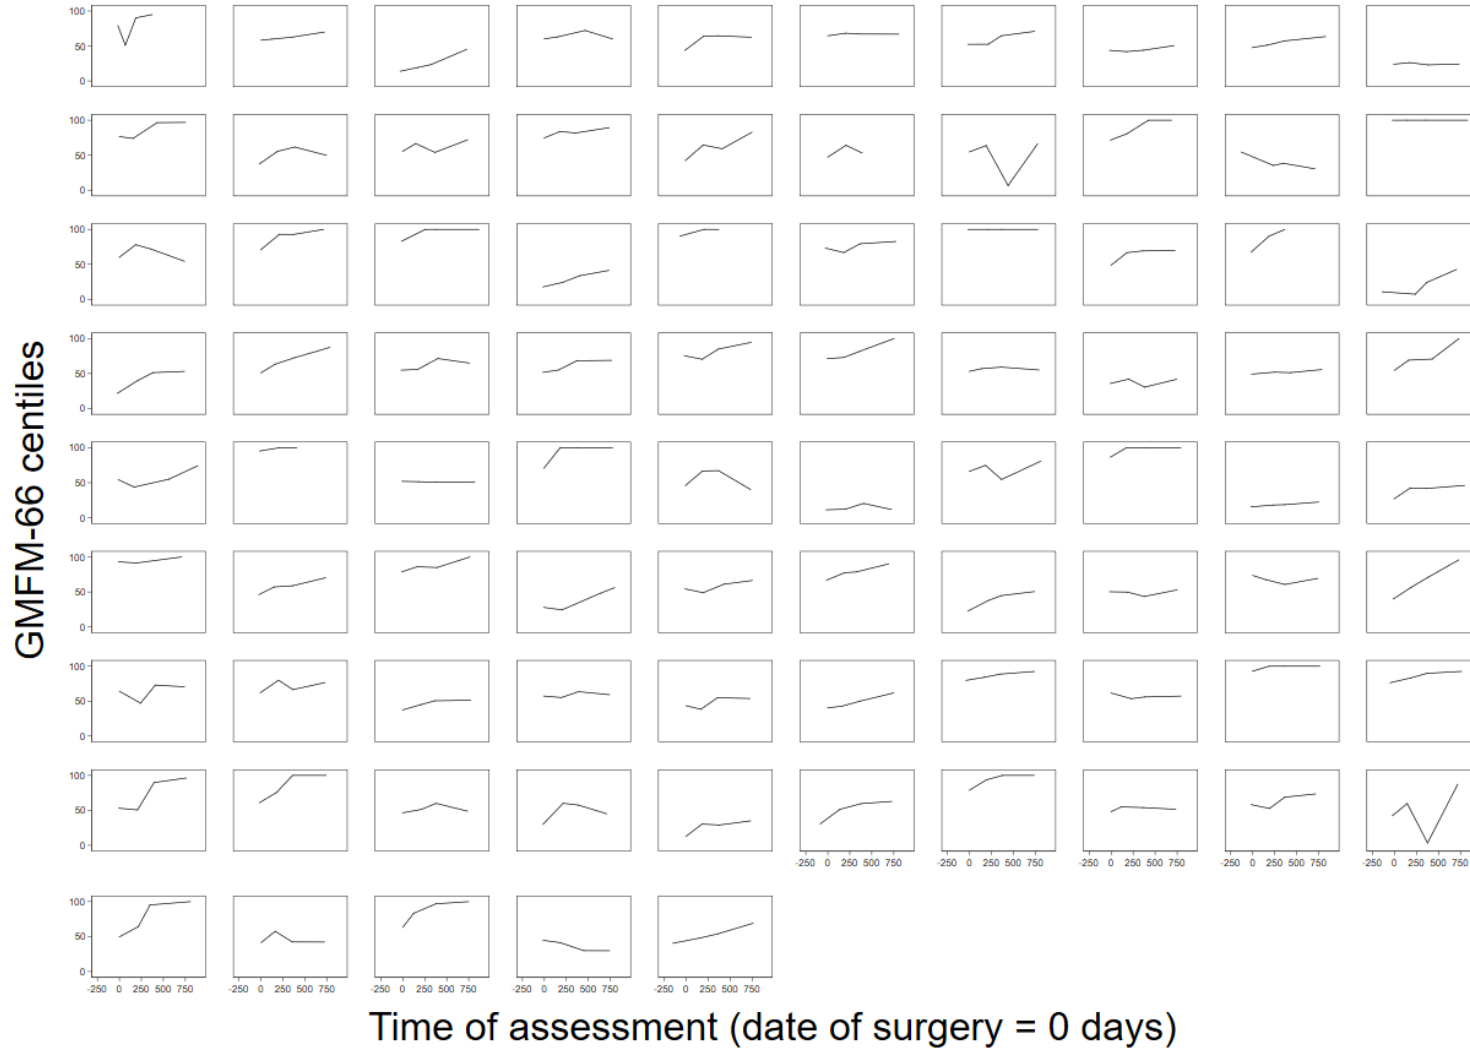

**Table S3: Mean change in GMFM-66 per year associated with SDR and available normative and RCT data**

| <b>Change in mean GMFM-66 per year</b>                                 | <b>All children</b> | <b>GMFCS level II</b> | <b>GMFCS level III</b> |
|------------------------------------------------------------------------|---------------------|-----------------------|------------------------|
| SDR values from current study: Random effect mixed model estimates     | 3.23                | 3.78                  | 2.88                   |
| Weighted CanChild norms <sup>7</sup>                                   | 1.9                 | 2.2                   | 1.7                    |
| Difference between SDR and control from the meta-analysis <sup>1</sup> | 2.66                |                       |                        |

**Table S4: Secondary outcomes**

| <b>Secondary outcomes (all children)</b> | <b>Pre-SDR</b>  | <b>24 months post-SDR</b> | <b>Analysis</b> |
|------------------------------------------|-----------------|---------------------------|-----------------|
| Modified Ashworth Scale (MAS)            |                 |                           |                 |
| Adduction in neutral – no.               |                 |                           |                 |
| Left                                     | 92              | 133                       | P<0.001         |
| Right                                    | 92              | 133                       | P<0.001         |
| Adduction in extension – no.             |                 |                           |                 |
| Left                                     | 110             | 133                       | P<0.001         |
| Right                                    | 113             | 133                       | P<0.001         |
| Hamstring – no.                          |                 |                           |                 |
| Left                                     | 137             | 132                       | P<0.001         |
| Right                                    | 137             | 132                       | P<0.001         |
| Gastrocnemius – no.                      |                 |                           |                 |
| Left                                     | 137             | 133                       | P<0.001         |
| Right                                    | 137             | 133                       | P<0.001         |
| Gait                                     |                 |                           |                 |
| Gait Profile Score – no., mean (SD)      | 108, 17.5 (5.6) | 95, 13.5 (4.2)            | P<0.001         |
| Physiotherapy Assessment*                |                 |                           |                 |
| Mobility Device – no./total no. (%)      |                 |                           |                 |
| Posterior walker                         | 89/251 (36)     | 70/255 (28)               | N/A             |
| Rifton pacer                             | 3/251 (1.2)     | 1/255 (0.4)               | N/A             |
| Forward walker                           | 5/251 (2.0)     | 9/255 (3.5)               | N/A             |
| Quad pods                                | 8/251 (3.2)     | 9/255 (3.5)               | N/A             |
| Tripods                                  | 17/251 (6.8)    | 28/255 (11)               | N/A             |
| Crutches                                 | 4/251 (1.6)     | 11/255 (4.3)              | N/A             |
| Independent                              | 33/251 (13)     | 38/255 (15)               | N/A             |
| Wheelchair                               | 92/251 (37)     | 89/255 (35)               | N/A             |
| Orthotics Device – no./total no. (%)     |                 |                           |                 |

| <b>Secondary outcomes (all children)</b> | <b>Pre-SDR</b> | <b>24 months post-SDR</b> | <b>Analysis</b> |
|------------------------------------------|----------------|---------------------------|-----------------|
| Ankle foot orthosis (AFO)                | 105/314 (33)   | 85/263 (32)               | N/A             |
| Hinged AFO                               | 12/314 (3.8)   | 9/263 (3.4)               | N/A             |
| Supramalleolar orthosis (SMO)            | 5/314 (1.6)    | 13/263 (4.9)              | N/A             |
| Boots                                    | 15/314 (4.8)   | 7/263 (2.7)               | N/A             |
| Insoles                                  | 3/314 (1.0)    | 15/263 (5.7)              | N/A             |
| Standard footwear                        | 14/314 (4.5)   | 25/263 (9.5)              | N/A             |
| Gaiters                                  | 33/314 (11)    | 32/263 (12)               | N/A             |
| Specialist seating                       | 68/314 (22)    | 40/263 (15)               | N/A             |
| Specialist standing                      | 59/314 (19)    | 37/263 (14)               | N/A             |
| <b>Boyd and Graham (all children)</b>    |                |                           |                 |
| DorsiFlexion – Left – no.                |                |                           | P<0.001         |
| 0                                        | 16             | 3                         |                 |
| 1                                        | 56             | 22                        |                 |
| 2                                        | 40             | 29                        |                 |
| 3                                        | 16             | 51                        |                 |
| 4                                        | 8              | 24                        |                 |
| DorsiFlexion – Right – no.               |                |                           | P<0.001         |
| 0                                        | 15             | 2                         |                 |
| 1                                        | 52             | 22                        |                 |
| 2                                        | 36             | 32                        |                 |
| 3                                        | 25             | 49                        |                 |
| 4                                        | 8              | 24                        |                 |

\* Physiotherapists reported that many patients used multiple mobility and orthotic devices.

## **Systematic review results/study overview**

We identified three RCTs<sup>8-10</sup> and one meta-analysis of the three RCTs<sup>1</sup> which fitted the criteria (see table S4).

**Table S5: Summary of relevant studies and their specific methodologies**

| Reference & Study details                                                                                                                                                                                                                                                                                                                                                                                                                                                                                                                                                                                                                                                                                                                | Overview/Methodologies                                                                                                                                                                                                                                                                                                                                                                                                                                                                                                                                                                                           | Key efficacy and safety findings                                                                                                                                                                                                                                                                                                                                                                                                                                                                                                                                                                                                                                                                                                                                                                                                                                                                                                                                                                                                                                                                                                                                                                                                                                                                                                                                                                                                                                                                                                                                                                                                                                                                                                                                                                                                                                                                                                                      | Comments                                                                                                                                                                                                                                                                                                                                                                                                                                                                                                                                                                                                                              |
|------------------------------------------------------------------------------------------------------------------------------------------------------------------------------------------------------------------------------------------------------------------------------------------------------------------------------------------------------------------------------------------------------------------------------------------------------------------------------------------------------------------------------------------------------------------------------------------------------------------------------------------------------------------------------------------------------------------------------------------|------------------------------------------------------------------------------------------------------------------------------------------------------------------------------------------------------------------------------------------------------------------------------------------------------------------------------------------------------------------------------------------------------------------------------------------------------------------------------------------------------------------------------------------------------------------------------------------------------------------|-------------------------------------------------------------------------------------------------------------------------------------------------------------------------------------------------------------------------------------------------------------------------------------------------------------------------------------------------------------------------------------------------------------------------------------------------------------------------------------------------------------------------------------------------------------------------------------------------------------------------------------------------------------------------------------------------------------------------------------------------------------------------------------------------------------------------------------------------------------------------------------------------------------------------------------------------------------------------------------------------------------------------------------------------------------------------------------------------------------------------------------------------------------------------------------------------------------------------------------------------------------------------------------------------------------------------------------------------------------------------------------------------------------------------------------------------------------------------------------------------------------------------------------------------------------------------------------------------------------------------------------------------------------------------------------------------------------------------------------------------------------------------------------------------------------------------------------------------------------------------------------------------------------------------------------------------------|---------------------------------------------------------------------------------------------------------------------------------------------------------------------------------------------------------------------------------------------------------------------------------------------------------------------------------------------------------------------------------------------------------------------------------------------------------------------------------------------------------------------------------------------------------------------------------------------------------------------------------------|
| <p>McLaughlin et al. (1998)<sup>8</sup></p> <p>Note: part of meta-analysis by McLaughlin et al. (2002)<sup>1</sup></p> <ul style="list-style-type: none"> <li>• RCT</li> <li>• Seattle, USA</li> <li>• n=43 patients.</li> <li>• Patients ranged from 3 years to 18 years. This study therefore includes children outside the stated inclusion criteria however we were unable to extract information on those between 3 and 9 years of age at the time of SDR surgery.</li> <li>• Hospitalisation ranged from 5 to 7 days and one surgeon performed all the surgeries.</li> <li>• Patients randomised to either SDR plus physiotherapy (PT) or PT only group.</li> <li>• Patients assessed at baseline, 6, 12 and 24 months.</li> </ul> | <ul style="list-style-type: none"> <li>• Of the 43 children who were enrolled there was no imbalance between the physiotherapy and physiotherapy and SDR group in terms of the following factors: gender, mean age at enrolment, age at start of treatment (not defined), ethnicity, gestational age, birthweight or cognitive ability. Six children withdrew from group assignment.</li> <li>• Two of those six were originally in the physiotherapy group but requested to be part of the SDR group.</li> <li>• One child in the PT group stopped participating after 6 months of physical therapy.</li> </ul> | <ul style="list-style-type: none"> <li>• Intention to treat and per protocol analyses were performed and they were <i>'statistically and clinically comparable'</i>.</li> <li>• Only the per protocol analyses were presented.</li> <li>• <i>'Several post hoc analyses were carried out on the GMFM data to search for sample subsets in which a difference favouring one of the treatment groups might be identified'</i>.</li> <li>• The authors stated that <i>'children undergoing SDR made no more progress in functional mobility than children who received intensive PT without surgery'</i> and that <i>'there was sufficient statistical power to minimise the possibility we missed a statistically clinically important difference favouring SDR by chance alone'</i>.</li> <li>• There was no evidence of a difference in the total GMFM-88 scores between the patients who had SDR and PT at 12 months (p=0.72) or at 24 months (p=0.94).</li> <li>• Authors note that their <i>'results indicate that children undergoing SDR in our study made no more progress in functional mobility than the children who received intensive PT without surgery as measured by the GMFM'</i>.</li> <li>• There was a difference of 1 grade (95% CI: -1.3 to -0.7) between the SDR and PT group at 12 months in comparison to baseline for the mean Ashworth scale in the major muscle groups in the lower extremities.</li> <li>• At 24 months, the SDR+PT group exceeded the PT only group in mean reduction of spasticity by SMS measurement (-8.2 versus +5.1 newton meters/radian, p=0.02).</li> <li>• The SDR+PT group and the PT only group demonstrated similar improvements in independent mobility on the GMFM score (7.0 versus 7.2 total percent score, p=0.94).</li> <li>• The authors noted that <i>'the magnitude of change in the SDR and PT group in this study is no more than the average progress (6%) obtained</i></li> </ul> | <ul style="list-style-type: none"> <li>• Authors conclude that <i>'Children undergoing SDR in our study made no more progress in functional mobility than children who received intensive PT without surgery, as measured by the GMFM'</i>.</li> <li>• Unclear as to why some secondary outcomes measures were collected by investigators who were unmasked.</li> <li>• Unclear how the Ashworth scale score was analysed, for example, the authors state that <i>'the mean Ashworth scale score for the major muscle groups in the lower extremities was reduced by one full grade in the SDR+PT group with no change</i></li> </ul> |

| Reference & Study details                                     | Overview/Methodologies                                                                                                                                                                                                                                                                                                                                                                                                                                                                                                                                                                                                                                                                                                         | Key efficacy and safety findings                                                                                                                                                                                                                                                                                                                                                                                                                                                                                                                                                                                                                                                                                                                                                                                                                                                                                                                                                                                                                                                                                                                                                                                                                                                                                                                                                                                                                                                                                                                                                                                                                                                                                                                                                                                                                                       | Comments                                                      |         |  |  |  |           |  |  |  |  |  |                                   |                                    |                     |         |               |             |            |                    |        |         |            |           |                   |        |                |            |           |                    |        |          |             |            |                    |        |               |            |           |                   |        |       |           |           |                   |        |           |  |  |  |  |                                                                                                                                                                                                                                                                                                                                             |
|---------------------------------------------------------------|--------------------------------------------------------------------------------------------------------------------------------------------------------------------------------------------------------------------------------------------------------------------------------------------------------------------------------------------------------------------------------------------------------------------------------------------------------------------------------------------------------------------------------------------------------------------------------------------------------------------------------------------------------------------------------------------------------------------------------|------------------------------------------------------------------------------------------------------------------------------------------------------------------------------------------------------------------------------------------------------------------------------------------------------------------------------------------------------------------------------------------------------------------------------------------------------------------------------------------------------------------------------------------------------------------------------------------------------------------------------------------------------------------------------------------------------------------------------------------------------------------------------------------------------------------------------------------------------------------------------------------------------------------------------------------------------------------------------------------------------------------------------------------------------------------------------------------------------------------------------------------------------------------------------------------------------------------------------------------------------------------------------------------------------------------------------------------------------------------------------------------------------------------------------------------------------------------------------------------------------------------------------------------------------------------------------------------------------------------------------------------------------------------------------------------------------------------------------------------------------------------------------------------------------------------------------------------------------------------------|---------------------------------------------------------------|---------|--|--|--|-----------|--|--|--|--|--|-----------------------------------|------------------------------------|---------------------|---------|---------------|-------------|------------|--------------------|--------|---------|------------|-----------|-------------------|--------|----------------|------------|-----------|--------------------|--------|----------|-------------|------------|--------------------|--------|---------------|------------|-----------|-------------------|--------|-------|-----------|-----------|-------------------|--------|-----------|--|--|--|--|---------------------------------------------------------------------------------------------------------------------------------------------------------------------------------------------------------------------------------------------------------------------------------------------------------------------------------------------|
|                                                               | <ul style="list-style-type: none"> <li>Used a 'sample size large enough to detect a 10 percentage point difference in GMFM with at least 90% power using a two-tailed significance level of 0.05'.</li> <li>At the time of publication, the clinical literature had no data regarding the placebo effect on the function of children undergoing SDR.</li> <li>The authors noted that the 'sham surgery was deemed unethical' which prevented the use of a double masked design.</li> <li>Investigators who had clinical contact with the children were not involved in the collection of primary outcome data and were masked to the results; 'padded tape was placed over the lower back and covered with a shirt'</li> </ul> | <p>by children with cerebral palsy who received no specialist interventions over a 6-month period in the original validation sample' (i.e. the original GMFM-88 paper).</p> <ul style="list-style-type: none"> <li>The authors noted that 'the intensity of the physical therapy may have masked the effect of SDR in the group comparison'.</li> <li>There were no persisting sensory awareness or bladder control problems. Four children in the SDR &amp; PT group suffered mild lower extremity paraesthesia for less than 8 weeks' post-surgery. No long lasting sensory awareness or bladder control AEs were experienced.</li> <li>The table below reproduces the reported GMFM change scores:</li> </ul> <table border="1" data-bbox="954 635 1868 1337"> <thead> <tr> <th colspan="5">Mobility outcomes: Gross Motor Function Measure change scores</th> </tr> <tr> <th colspan="5">12 months</th> </tr> <tr> <th></th> <th>SDR+PT (n=21)<br/>Mean change (SD)</th> <th>PT only (n=17)<br/>Mean change (SD)</th> <th>Difference (95% CI)</th> <th>P value</th> </tr> </thead> <tbody> <tr> <td>Lying/rolling</td> <td>-0.01 (5.0)</td> <td>0.83 (1.8)</td> <td>-0.8 (-3.5 to 1.8)</td> <td>p=0.53</td> </tr> <tr> <td>Sitting</td> <td>3.7 (13.2)</td> <td>2.5 (7.9)</td> <td>1.2 (-5.8 to 8.2)</td> <td>p=0.73</td> </tr> <tr> <td>Crawl/kneeling</td> <td>2.8 (13.4)</td> <td>2.9 (6.5)</td> <td>-0.1 (-6.8 to 6.6)</td> <td>p=0.98</td> </tr> <tr> <td>Standing</td> <td>10.1 (13.9)</td> <td>7.5 (18.5)</td> <td>2.6 (-8.4 to 14.0)</td> <td>p=0.63</td> </tr> <tr> <td>Walk/run/jump</td> <td>7.8 (10.5)</td> <td>7.3 (9.1)</td> <td>0.5 (-6.0 to 7.0)</td> <td>p=0.88</td> </tr> <tr> <td>Total</td> <td>4.9 (7.6)</td> <td>4.2 (5.5)</td> <td>0.8 (-3.5 to 5.0)</td> <td>p=0.72</td> </tr> <tr> <th colspan="5">24 months</th> </tr> </tbody> </table> | Mobility outcomes: Gross Motor Function Measure change scores |         |  |  |  | 12 months |  |  |  |  |  | SDR+PT (n=21)<br>Mean change (SD) | PT only (n=17)<br>Mean change (SD) | Difference (95% CI) | P value | Lying/rolling | -0.01 (5.0) | 0.83 (1.8) | -0.8 (-3.5 to 1.8) | p=0.53 | Sitting | 3.7 (13.2) | 2.5 (7.9) | 1.2 (-5.8 to 8.2) | p=0.73 | Crawl/kneeling | 2.8 (13.4) | 2.9 (6.5) | -0.1 (-6.8 to 6.6) | p=0.98 | Standing | 10.1 (13.9) | 7.5 (18.5) | 2.6 (-8.4 to 14.0) | p=0.63 | Walk/run/jump | 7.8 (10.5) | 7.3 (9.1) | 0.5 (-6.0 to 7.0) | p=0.88 | Total | 4.9 (7.6) | 4.2 (5.5) | 0.8 (-3.5 to 5.0) | p=0.72 | 24 months |  |  |  |  | <p>in the PT only group (<math>p&lt;0.001</math>) at 12 and 24 months', however, from Table VI the median and range are presented and appear to have been analysed using a Wilcoxon Mann Whitney U test.</p> <ul style="list-style-type: none"> <li>The authors report post-hoc subgroup analyses that were not stated a priori.</li> </ul> |
| Mobility outcomes: Gross Motor Function Measure change scores |                                                                                                                                                                                                                                                                                                                                                                                                                                                                                                                                                                                                                                                                                                                                |                                                                                                                                                                                                                                                                                                                                                                                                                                                                                                                                                                                                                                                                                                                                                                                                                                                                                                                                                                                                                                                                                                                                                                                                                                                                                                                                                                                                                                                                                                                                                                                                                                                                                                                                                                                                                                                                        |                                                               |         |  |  |  |           |  |  |  |  |  |                                   |                                    |                     |         |               |             |            |                    |        |         |            |           |                   |        |                |            |           |                    |        |          |             |            |                    |        |               |            |           |                   |        |       |           |           |                   |        |           |  |  |  |  |                                                                                                                                                                                                                                                                                                                                             |
| 12 months                                                     |                                                                                                                                                                                                                                                                                                                                                                                                                                                                                                                                                                                                                                                                                                                                |                                                                                                                                                                                                                                                                                                                                                                                                                                                                                                                                                                                                                                                                                                                                                                                                                                                                                                                                                                                                                                                                                                                                                                                                                                                                                                                                                                                                                                                                                                                                                                                                                                                                                                                                                                                                                                                                        |                                                               |         |  |  |  |           |  |  |  |  |  |                                   |                                    |                     |         |               |             |            |                    |        |         |            |           |                   |        |                |            |           |                    |        |          |             |            |                    |        |               |            |           |                   |        |       |           |           |                   |        |           |  |  |  |  |                                                                                                                                                                                                                                                                                                                                             |
|                                                               | SDR+PT (n=21)<br>Mean change (SD)                                                                                                                                                                                                                                                                                                                                                                                                                                                                                                                                                                                                                                                                                              | PT only (n=17)<br>Mean change (SD)                                                                                                                                                                                                                                                                                                                                                                                                                                                                                                                                                                                                                                                                                                                                                                                                                                                                                                                                                                                                                                                                                                                                                                                                                                                                                                                                                                                                                                                                                                                                                                                                                                                                                                                                                                                                                                     | Difference (95% CI)                                           | P value |  |  |  |           |  |  |  |  |  |                                   |                                    |                     |         |               |             |            |                    |        |         |            |           |                   |        |                |            |           |                    |        |          |             |            |                    |        |               |            |           |                   |        |       |           |           |                   |        |           |  |  |  |  |                                                                                                                                                                                                                                                                                                                                             |
| Lying/rolling                                                 | -0.01 (5.0)                                                                                                                                                                                                                                                                                                                                                                                                                                                                                                                                                                                                                                                                                                                    | 0.83 (1.8)                                                                                                                                                                                                                                                                                                                                                                                                                                                                                                                                                                                                                                                                                                                                                                                                                                                                                                                                                                                                                                                                                                                                                                                                                                                                                                                                                                                                                                                                                                                                                                                                                                                                                                                                                                                                                                                             | -0.8 (-3.5 to 1.8)                                            | p=0.53  |  |  |  |           |  |  |  |  |  |                                   |                                    |                     |         |               |             |            |                    |        |         |            |           |                   |        |                |            |           |                    |        |          |             |            |                    |        |               |            |           |                   |        |       |           |           |                   |        |           |  |  |  |  |                                                                                                                                                                                                                                                                                                                                             |
| Sitting                                                       | 3.7 (13.2)                                                                                                                                                                                                                                                                                                                                                                                                                                                                                                                                                                                                                                                                                                                     | 2.5 (7.9)                                                                                                                                                                                                                                                                                                                                                                                                                                                                                                                                                                                                                                                                                                                                                                                                                                                                                                                                                                                                                                                                                                                                                                                                                                                                                                                                                                                                                                                                                                                                                                                                                                                                                                                                                                                                                                                              | 1.2 (-5.8 to 8.2)                                             | p=0.73  |  |  |  |           |  |  |  |  |  |                                   |                                    |                     |         |               |             |            |                    |        |         |            |           |                   |        |                |            |           |                    |        |          |             |            |                    |        |               |            |           |                   |        |       |           |           |                   |        |           |  |  |  |  |                                                                                                                                                                                                                                                                                                                                             |
| Crawl/kneeling                                                | 2.8 (13.4)                                                                                                                                                                                                                                                                                                                                                                                                                                                                                                                                                                                                                                                                                                                     | 2.9 (6.5)                                                                                                                                                                                                                                                                                                                                                                                                                                                                                                                                                                                                                                                                                                                                                                                                                                                                                                                                                                                                                                                                                                                                                                                                                                                                                                                                                                                                                                                                                                                                                                                                                                                                                                                                                                                                                                                              | -0.1 (-6.8 to 6.6)                                            | p=0.98  |  |  |  |           |  |  |  |  |  |                                   |                                    |                     |         |               |             |            |                    |        |         |            |           |                   |        |                |            |           |                    |        |          |             |            |                    |        |               |            |           |                   |        |       |           |           |                   |        |           |  |  |  |  |                                                                                                                                                                                                                                                                                                                                             |
| Standing                                                      | 10.1 (13.9)                                                                                                                                                                                                                                                                                                                                                                                                                                                                                                                                                                                                                                                                                                                    | 7.5 (18.5)                                                                                                                                                                                                                                                                                                                                                                                                                                                                                                                                                                                                                                                                                                                                                                                                                                                                                                                                                                                                                                                                                                                                                                                                                                                                                                                                                                                                                                                                                                                                                                                                                                                                                                                                                                                                                                                             | 2.6 (-8.4 to 14.0)                                            | p=0.63  |  |  |  |           |  |  |  |  |  |                                   |                                    |                     |         |               |             |            |                    |        |         |            |           |                   |        |                |            |           |                    |        |          |             |            |                    |        |               |            |           |                   |        |       |           |           |                   |        |           |  |  |  |  |                                                                                                                                                                                                                                                                                                                                             |
| Walk/run/jump                                                 | 7.8 (10.5)                                                                                                                                                                                                                                                                                                                                                                                                                                                                                                                                                                                                                                                                                                                     | 7.3 (9.1)                                                                                                                                                                                                                                                                                                                                                                                                                                                                                                                                                                                                                                                                                                                                                                                                                                                                                                                                                                                                                                                                                                                                                                                                                                                                                                                                                                                                                                                                                                                                                                                                                                                                                                                                                                                                                                                              | 0.5 (-6.0 to 7.0)                                             | p=0.88  |  |  |  |           |  |  |  |  |  |                                   |                                    |                     |         |               |             |            |                    |        |         |            |           |                   |        |                |            |           |                    |        |          |             |            |                    |        |               |            |           |                   |        |       |           |           |                   |        |           |  |  |  |  |                                                                                                                                                                                                                                                                                                                                             |
| Total                                                         | 4.9 (7.6)                                                                                                                                                                                                                                                                                                                                                                                                                                                                                                                                                                                                                                                                                                                      | 4.2 (5.5)                                                                                                                                                                                                                                                                                                                                                                                                                                                                                                                                                                                                                                                                                                                                                                                                                                                                                                                                                                                                                                                                                                                                                                                                                                                                                                                                                                                                                                                                                                                                                                                                                                                                                                                                                                                                                                                              | 0.8 (-3.5 to 5.0)                                             | p=0.72  |  |  |  |           |  |  |  |  |  |                                   |                                    |                     |         |               |             |            |                    |        |         |            |           |                   |        |                |            |           |                    |        |          |             |            |                    |        |               |            |           |                   |        |       |           |           |                   |        |           |  |  |  |  |                                                                                                                                                                                                                                                                                                                                             |
| 24 months                                                     |                                                                                                                                                                                                                                                                                                                                                                                                                                                                                                                                                                                                                                                                                                                                |                                                                                                                                                                                                                                                                                                                                                                                                                                                                                                                                                                                                                                                                                                                                                                                                                                                                                                                                                                                                                                                                                                                                                                                                                                                                                                                                                                                                                                                                                                                                                                                                                                                                                                                                                                                                                                                                        |                                                               |         |  |  |  |           |  |  |  |  |  |                                   |                                    |                     |         |               |             |            |                    |        |         |            |           |                   |        |                |            |           |                    |        |          |             |            |                    |        |               |            |           |                   |        |       |           |           |                   |        |           |  |  |  |  |                                                                                                                                                                                                                                                                                                                                             |

| Reference & Study details                      | Overview/Methodologies                                                                                                                                                                                                                                                                                                                                                                                                                                                                                                                                                                                                                                                                                                         | Key efficacy and safety findings                                                                                                                                                                                                                                                                                                                                                                                                                                                                                                                                                                                                                                                                                                                                                                                                                                                                                                                                                                                                                                                        |                           |                                            |                                             | Comments                                       |         |               |           |           |                    |          |         |           |            |                    |          |                |            |           |                    |        |          |            |                      |                    |        |               |             |             |                    |        |              |                  |                  |                           |               |   |   |         |   |   |   |   |               |   |   |   |   |                            |   |   |    |   |                        |   |   |   |   |                      |   |   |   |   |  |
|------------------------------------------------|--------------------------------------------------------------------------------------------------------------------------------------------------------------------------------------------------------------------------------------------------------------------------------------------------------------------------------------------------------------------------------------------------------------------------------------------------------------------------------------------------------------------------------------------------------------------------------------------------------------------------------------------------------------------------------------------------------------------------------|-----------------------------------------------------------------------------------------------------------------------------------------------------------------------------------------------------------------------------------------------------------------------------------------------------------------------------------------------------------------------------------------------------------------------------------------------------------------------------------------------------------------------------------------------------------------------------------------------------------------------------------------------------------------------------------------------------------------------------------------------------------------------------------------------------------------------------------------------------------------------------------------------------------------------------------------------------------------------------------------------------------------------------------------------------------------------------------------|---------------------------|--------------------------------------------|---------------------------------------------|------------------------------------------------|---------|---------------|-----------|-----------|--------------------|----------|---------|-----------|------------|--------------------|----------|----------------|------------|-----------|--------------------|--------|----------|------------|----------------------|--------------------|--------|---------------|-------------|-------------|--------------------|--------|--------------|------------------|------------------|---------------------------|---------------|---|---|---------|---|---|---|---|---------------|---|---|---|---|----------------------------|---|---|----|---|------------------------|---|---|---|---|----------------------|---|---|---|---|--|
|                                                | <p>before each child attended their data collection location.</p> <ul style="list-style-type: none"> <li>Children and families were reminded not to reveal their group allocation, however two breaks did occur and another member of staff performed data collection.</li> <li>The randomisation strategy employed was the sealed envelope technique.</li> <li>'A 15 percentage point improvement on the GMFM total score' was defined as a child who was very responsive to treatment.</li> <li>T tests were used for continuous variables, whilst a chi squared test or Fisher's exact test were used for categorical variables. Mann-Whitney U test was used 'where normal distributions could not be assumed'.</li> </ul> | <table border="1"> <thead> <tr> <th></th> <th>SDR+PT<br/>(n=21)<br/>Mean<br/>change<br/>(SD)</th> <th>PT only<br/>(n=17)<br/>Mean<br/>change<br/>(SD)</th> <th>Difference<br/>(95% CI)</th> <th>P value</th> </tr> </thead> <tbody> <tr> <td>Lying/rolling</td> <td>1.1 (2.9)</td> <td>1.2 (3.7)</td> <td>-0.1 (-2.2 to 2.1)</td> <td>p=0.97</td> </tr> <tr> <td>Sitting</td> <td>4.6 (8.4)</td> <td>6.2 (12.7)</td> <td>-1.6 (-8.5 to 5.4)</td> <td>p=0.65</td> </tr> <tr> <td>Crawl/kneeling</td> <td>4.4 (11.1)</td> <td>4.7 (8.6)</td> <td>-0.3 (-7.0 to 6.4)</td> <td>p=0.93</td> </tr> <tr> <td>Standing</td> <td>9.9 (21.0)</td> <td>13.3 (15.9)</td> <td>-3.4 (16.0 to 9.1)</td> <td>p=0.59</td> </tr> <tr> <td>Walk/run/jump</td> <td>12.4 (12.6)</td> <td>10.8 (16.5)</td> <td>1.6 (-8.0 to 11.0)</td> <td>p=0.74</td> </tr> <tr> <td><b>Total</b></td> <td><b>7.0 (7.0)</b></td> <td><b>7.2 (8.3)</b></td> <td><b>-0.2 (-5.2 to 4.8)</b></td> <td><b>p=0.94</b></td> </tr> </tbody> </table>                                                                                 |                           | SDR+PT<br>(n=21)<br>Mean<br>change<br>(SD) | PT only<br>(n=17)<br>Mean<br>change<br>(SD) | Difference<br>(95% CI)                         | P value | Lying/rolling | 1.1 (2.9) | 1.2 (3.7) | -0.1 (-2.2 to 2.1) | p=0.97   | Sitting | 4.6 (8.4) | 6.2 (12.7) | -1.6 (-8.5 to 5.4) | p=0.65   | Crawl/kneeling | 4.4 (11.1) | 4.7 (8.6) | -0.3 (-7.0 to 6.4) | p=0.93 | Standing | 9.9 (21.0) | 13.3 (15.9)          | -3.4 (16.0 to 9.1) | p=0.59 | Walk/run/jump | 12.4 (12.6) | 10.8 (16.5) | 1.6 (-8.0 to 11.0) | p=0.74 | <b>Total</b> | <b>7.0 (7.0)</b> | <b>7.2 (8.3)</b> | <b>-0.2 (-5.2 to 4.8)</b> | <b>p=0.94</b> |   |   |         |   |   |   |   |               |   |   |   |   |                            |   |   |    |   |                        |   |   |   |   |                      |   |   |   |   |  |
|                                                | SDR+PT<br>(n=21)<br>Mean<br>change<br>(SD)                                                                                                                                                                                                                                                                                                                                                                                                                                                                                                                                                                                                                                                                                     | PT only<br>(n=17)<br>Mean<br>change<br>(SD)                                                                                                                                                                                                                                                                                                                                                                                                                                                                                                                                                                                                                                                                                                                                                                                                                                                                                                                                                                                                                                             | Difference<br>(95% CI)    | P value                                    |                                             |                                                |         |               |           |           |                    |          |         |           |            |                    |          |                |            |           |                    |        |          |            |                      |                    |        |               |             |             |                    |        |              |                  |                  |                           |               |   |   |         |   |   |   |   |               |   |   |   |   |                            |   |   |    |   |                        |   |   |   |   |                      |   |   |   |   |  |
| Lying/rolling                                  | 1.1 (2.9)                                                                                                                                                                                                                                                                                                                                                                                                                                                                                                                                                                                                                                                                                                                      | 1.2 (3.7)                                                                                                                                                                                                                                                                                                                                                                                                                                                                                                                                                                                                                                                                                                                                                                                                                                                                                                                                                                                                                                                                               | -0.1 (-2.2 to 2.1)        | p=0.97                                     |                                             |                                                |         |               |           |           |                    |          |         |           |            |                    |          |                |            |           |                    |        |          |            |                      |                    |        |               |             |             |                    |        |              |                  |                  |                           |               |   |   |         |   |   |   |   |               |   |   |   |   |                            |   |   |    |   |                        |   |   |   |   |                      |   |   |   |   |  |
| Sitting                                        | 4.6 (8.4)                                                                                                                                                                                                                                                                                                                                                                                                                                                                                                                                                                                                                                                                                                                      | 6.2 (12.7)                                                                                                                                                                                                                                                                                                                                                                                                                                                                                                                                                                                                                                                                                                                                                                                                                                                                                                                                                                                                                                                                              | -1.6 (-8.5 to 5.4)        | p=0.65                                     |                                             |                                                |         |               |           |           |                    |          |         |           |            |                    |          |                |            |           |                    |        |          |            |                      |                    |        |               |             |             |                    |        |              |                  |                  |                           |               |   |   |         |   |   |   |   |               |   |   |   |   |                            |   |   |    |   |                        |   |   |   |   |                      |   |   |   |   |  |
| Crawl/kneeling                                 | 4.4 (11.1)                                                                                                                                                                                                                                                                                                                                                                                                                                                                                                                                                                                                                                                                                                                     | 4.7 (8.6)                                                                                                                                                                                                                                                                                                                                                                                                                                                                                                                                                                                                                                                                                                                                                                                                                                                                                                                                                                                                                                                                               | -0.3 (-7.0 to 6.4)        | p=0.93                                     |                                             |                                                |         |               |           |           |                    |          |         |           |            |                    |          |                |            |           |                    |        |          |            |                      |                    |        |               |             |             |                    |        |              |                  |                  |                           |               |   |   |         |   |   |   |   |               |   |   |   |   |                            |   |   |    |   |                        |   |   |   |   |                      |   |   |   |   |  |
| Standing                                       | 9.9 (21.0)                                                                                                                                                                                                                                                                                                                                                                                                                                                                                                                                                                                                                                                                                                                     | 13.3 (15.9)                                                                                                                                                                                                                                                                                                                                                                                                                                                                                                                                                                                                                                                                                                                                                                                                                                                                                                                                                                                                                                                                             | -3.4 (16.0 to 9.1)        | p=0.59                                     |                                             |                                                |         |               |           |           |                    |          |         |           |            |                    |          |                |            |           |                    |        |          |            |                      |                    |        |               |             |             |                    |        |              |                  |                  |                           |               |   |   |         |   |   |   |   |               |   |   |   |   |                            |   |   |    |   |                        |   |   |   |   |                      |   |   |   |   |  |
| Walk/run/jump                                  | 12.4 (12.6)                                                                                                                                                                                                                                                                                                                                                                                                                                                                                                                                                                                                                                                                                                                    | 10.8 (16.5)                                                                                                                                                                                                                                                                                                                                                                                                                                                                                                                                                                                                                                                                                                                                                                                                                                                                                                                                                                                                                                                                             | 1.6 (-8.0 to 11.0)        | p=0.74                                     |                                             |                                                |         |               |           |           |                    |          |         |           |            |                    |          |                |            |           |                    |        |          |            |                      |                    |        |               |             |             |                    |        |              |                  |                  |                           |               |   |   |         |   |   |   |   |               |   |   |   |   |                            |   |   |    |   |                        |   |   |   |   |                      |   |   |   |   |  |
| <b>Total</b>                                   | <b>7.0 (7.0)</b>                                                                                                                                                                                                                                                                                                                                                                                                                                                                                                                                                                                                                                                                                                               | <b>7.2 (8.3)</b>                                                                                                                                                                                                                                                                                                                                                                                                                                                                                                                                                                                                                                                                                                                                                                                                                                                                                                                                                                                                                                                                        | <b>-0.2 (-5.2 to 4.8)</b> | <b>p=0.94</b>                              |                                             |                                                |         |               |           |           |                    |          |         |           |            |                    |          |                |            |           |                    |        |          |            |                      |                    |        |               |             |             |                    |        |              |                  |                  |                           |               |   |   |         |   |   |   |   |               |   |   |   |   |                            |   |   |    |   |                        |   |   |   |   |                      |   |   |   |   |  |
|                                                |                                                                                                                                                                                                                                                                                                                                                                                                                                                                                                                                                                                                                                                                                                                                | <ul style="list-style-type: none"> <li>The table below shows the adverse events reported within the study. The authors noted that 'there were no serious adverse events'.</li> </ul>                                                                                                                                                                                                                                                                                                                                                                                                                                                                                                                                                                                                                                                                                                                                                                                                                                                                                                    |                           |                                            |                                             |                                                |         |               |           |           |                    |          |         |           |            |                    |          |                |            |           |                    |        |          |            |                      |                    |        |               |             |             |                    |        |              |                  |                  |                           |               |   |   |         |   |   |   |   |               |   |   |   |   |                            |   |   |    |   |                        |   |   |   |   |                      |   |   |   |   |  |
|                                                |                                                                                                                                                                                                                                                                                                                                                                                                                                                                                                                                                                                                                                                                                                                                | <table border="1"> <thead> <tr> <th colspan="5">Summary of adverse events related to treatment</th> </tr> <tr> <th rowspan="2">Adverse event</th> <th colspan="2">SDR + PT</th> <th colspan="2">PT Only</th> </tr> <tr> <th>Events</th> <th>Children</th> <th>Events</th> <th>Children</th> </tr> </thead> <tbody> <tr> <td>Back pain</td> <td>14</td> <td>6</td> <td>0</td> <td>0</td> </tr> <tr> <td>Lower extremity pain</td> <td>11</td> <td>10</td> <td>19</td> <td>16</td> </tr> <tr> <td>Fatigue</td> <td>2</td> <td>2</td> <td>9</td> <td>7</td> </tr> <tr> <td>Weakness</td> <td>5</td> <td>4</td> <td>5</td> <td>3</td> </tr> <tr> <td>Urinary</td> <td>3</td> <td>3</td> <td>0</td> <td>0</td> </tr> <tr> <td>Brace problem</td> <td>3</td> <td>3</td> <td>1</td> <td>1</td> </tr> <tr> <td>Emotional/behavioral in PT</td> <td>7</td> <td>6</td> <td>13</td> <td>6</td> </tr> <tr> <td>Other, musculoskeletal</td> <td>3</td> <td>3</td> <td>0</td> <td>0</td> </tr> <tr> <td>Other, miscellaneous</td> <td>1</td> <td>1</td> <td>1</td> <td>1</td> </tr> </tbody> </table> |                           |                                            |                                             | Summary of adverse events related to treatment |         |               |           |           | Adverse event      | SDR + PT |         | PT Only   |            | Events             | Children | Events         | Children   | Back pain | 14                 | 6      | 0        | 0          | Lower extremity pain | 11                 | 10     | 19            | 16          | Fatigue     | 2                  | 2      | 9            | 7                | Weakness         | 5                         | 4             | 5 | 3 | Urinary | 3 | 3 | 0 | 0 | Brace problem | 3 | 3 | 1 | 1 | Emotional/behavioral in PT | 7 | 6 | 13 | 6 | Other, musculoskeletal | 3 | 3 | 0 | 0 | Other, miscellaneous | 1 | 1 | 1 | 1 |  |
| Summary of adverse events related to treatment |                                                                                                                                                                                                                                                                                                                                                                                                                                                                                                                                                                                                                                                                                                                                |                                                                                                                                                                                                                                                                                                                                                                                                                                                                                                                                                                                                                                                                                                                                                                                                                                                                                                                                                                                                                                                                                         |                           |                                            |                                             |                                                |         |               |           |           |                    |          |         |           |            |                    |          |                |            |           |                    |        |          |            |                      |                    |        |               |             |             |                    |        |              |                  |                  |                           |               |   |   |         |   |   |   |   |               |   |   |   |   |                            |   |   |    |   |                        |   |   |   |   |                      |   |   |   |   |  |
| Adverse event                                  | SDR + PT                                                                                                                                                                                                                                                                                                                                                                                                                                                                                                                                                                                                                                                                                                                       |                                                                                                                                                                                                                                                                                                                                                                                                                                                                                                                                                                                                                                                                                                                                                                                                                                                                                                                                                                                                                                                                                         | PT Only                   |                                            |                                             |                                                |         |               |           |           |                    |          |         |           |            |                    |          |                |            |           |                    |        |          |            |                      |                    |        |               |             |             |                    |        |              |                  |                  |                           |               |   |   |         |   |   |   |   |               |   |   |   |   |                            |   |   |    |   |                        |   |   |   |   |                      |   |   |   |   |  |
|                                                | Events                                                                                                                                                                                                                                                                                                                                                                                                                                                                                                                                                                                                                                                                                                                         | Children                                                                                                                                                                                                                                                                                                                                                                                                                                                                                                                                                                                                                                                                                                                                                                                                                                                                                                                                                                                                                                                                                | Events                    | Children                                   |                                             |                                                |         |               |           |           |                    |          |         |           |            |                    |          |                |            |           |                    |        |          |            |                      |                    |        |               |             |             |                    |        |              |                  |                  |                           |               |   |   |         |   |   |   |   |               |   |   |   |   |                            |   |   |    |   |                        |   |   |   |   |                      |   |   |   |   |  |
| Back pain                                      | 14                                                                                                                                                                                                                                                                                                                                                                                                                                                                                                                                                                                                                                                                                                                             | 6                                                                                                                                                                                                                                                                                                                                                                                                                                                                                                                                                                                                                                                                                                                                                                                                                                                                                                                                                                                                                                                                                       | 0                         | 0                                          |                                             |                                                |         |               |           |           |                    |          |         |           |            |                    |          |                |            |           |                    |        |          |            |                      |                    |        |               |             |             |                    |        |              |                  |                  |                           |               |   |   |         |   |   |   |   |               |   |   |   |   |                            |   |   |    |   |                        |   |   |   |   |                      |   |   |   |   |  |
| Lower extremity pain                           | 11                                                                                                                                                                                                                                                                                                                                                                                                                                                                                                                                                                                                                                                                                                                             | 10                                                                                                                                                                                                                                                                                                                                                                                                                                                                                                                                                                                                                                                                                                                                                                                                                                                                                                                                                                                                                                                                                      | 19                        | 16                                         |                                             |                                                |         |               |           |           |                    |          |         |           |            |                    |          |                |            |           |                    |        |          |            |                      |                    |        |               |             |             |                    |        |              |                  |                  |                           |               |   |   |         |   |   |   |   |               |   |   |   |   |                            |   |   |    |   |                        |   |   |   |   |                      |   |   |   |   |  |
| Fatigue                                        | 2                                                                                                                                                                                                                                                                                                                                                                                                                                                                                                                                                                                                                                                                                                                              | 2                                                                                                                                                                                                                                                                                                                                                                                                                                                                                                                                                                                                                                                                                                                                                                                                                                                                                                                                                                                                                                                                                       | 9                         | 7                                          |                                             |                                                |         |               |           |           |                    |          |         |           |            |                    |          |                |            |           |                    |        |          |            |                      |                    |        |               |             |             |                    |        |              |                  |                  |                           |               |   |   |         |   |   |   |   |               |   |   |   |   |                            |   |   |    |   |                        |   |   |   |   |                      |   |   |   |   |  |
| Weakness                                       | 5                                                                                                                                                                                                                                                                                                                                                                                                                                                                                                                                                                                                                                                                                                                              | 4                                                                                                                                                                                                                                                                                                                                                                                                                                                                                                                                                                                                                                                                                                                                                                                                                                                                                                                                                                                                                                                                                       | 5                         | 3                                          |                                             |                                                |         |               |           |           |                    |          |         |           |            |                    |          |                |            |           |                    |        |          |            |                      |                    |        |               |             |             |                    |        |              |                  |                  |                           |               |   |   |         |   |   |   |   |               |   |   |   |   |                            |   |   |    |   |                        |   |   |   |   |                      |   |   |   |   |  |
| Urinary                                        | 3                                                                                                                                                                                                                                                                                                                                                                                                                                                                                                                                                                                                                                                                                                                              | 3                                                                                                                                                                                                                                                                                                                                                                                                                                                                                                                                                                                                                                                                                                                                                                                                                                                                                                                                                                                                                                                                                       | 0                         | 0                                          |                                             |                                                |         |               |           |           |                    |          |         |           |            |                    |          |                |            |           |                    |        |          |            |                      |                    |        |               |             |             |                    |        |              |                  |                  |                           |               |   |   |         |   |   |   |   |               |   |   |   |   |                            |   |   |    |   |                        |   |   |   |   |                      |   |   |   |   |  |
| Brace problem                                  | 3                                                                                                                                                                                                                                                                                                                                                                                                                                                                                                                                                                                                                                                                                                                              | 3                                                                                                                                                                                                                                                                                                                                                                                                                                                                                                                                                                                                                                                                                                                                                                                                                                                                                                                                                                                                                                                                                       | 1                         | 1                                          |                                             |                                                |         |               |           |           |                    |          |         |           |            |                    |          |                |            |           |                    |        |          |            |                      |                    |        |               |             |             |                    |        |              |                  |                  |                           |               |   |   |         |   |   |   |   |               |   |   |   |   |                            |   |   |    |   |                        |   |   |   |   |                      |   |   |   |   |  |
| Emotional/behavioral in PT                     | 7                                                                                                                                                                                                                                                                                                                                                                                                                                                                                                                                                                                                                                                                                                                              | 6                                                                                                                                                                                                                                                                                                                                                                                                                                                                                                                                                                                                                                                                                                                                                                                                                                                                                                                                                                                                                                                                                       | 13                        | 6                                          |                                             |                                                |         |               |           |           |                    |          |         |           |            |                    |          |                |            |           |                    |        |          |            |                      |                    |        |               |             |             |                    |        |              |                  |                  |                           |               |   |   |         |   |   |   |   |               |   |   |   |   |                            |   |   |    |   |                        |   |   |   |   |                      |   |   |   |   |  |
| Other, musculoskeletal                         | 3                                                                                                                                                                                                                                                                                                                                                                                                                                                                                                                                                                                                                                                                                                                              | 3                                                                                                                                                                                                                                                                                                                                                                                                                                                                                                                                                                                                                                                                                                                                                                                                                                                                                                                                                                                                                                                                                       | 0                         | 0                                          |                                             |                                                |         |               |           |           |                    |          |         |           |            |                    |          |                |            |           |                    |        |          |            |                      |                    |        |               |             |             |                    |        |              |                  |                  |                           |               |   |   |         |   |   |   |   |               |   |   |   |   |                            |   |   |    |   |                        |   |   |   |   |                      |   |   |   |   |  |
| Other, miscellaneous                           | 1                                                                                                                                                                                                                                                                                                                                                                                                                                                                                                                                                                                                                                                                                                                              | 1                                                                                                                                                                                                                                                                                                                                                                                                                                                                                                                                                                                                                                                                                                                                                                                                                                                                                                                                                                                                                                                                                       | 1                         | 1                                          |                                             |                                                |         |               |           |           |                    |          |         |           |            |                    |          |                |            |           |                    |        |          |            |                      |                    |        |               |             |             |                    |        |              |                  |                  |                           |               |   |   |         |   |   |   |   |               |   |   |   |   |                            |   |   |    |   |                        |   |   |   |   |                      |   |   |   |   |  |



| Reference & Study details                                                                                                                                                                                                                                                                                      | Overview/Methodologies                                                                                                                                                                                                                                                                                                                                                                                                                                    | Key efficacy and safety findings                                                                                                                                                                                                                                                                                                                                                                                                                                                                                                                                                                                                                                                                                                                                                                                                                                                                                                                                                                                                                                                                                                                                                                                                                                                                                                                                                   |           |           |  | Comments       |      |          |         |                          |                       |                        |           |                                                                                                                                                                                                                                                                               |           |                                                 |  |  |  |           |  |  |  |                                   |                                  |                        |         |                      |                       |                        |         |           |  |  |  |                                   |                                  |                        |         |                         |                    |                        |         |  |
|----------------------------------------------------------------------------------------------------------------------------------------------------------------------------------------------------------------------------------------------------------------------------------------------------------------|-----------------------------------------------------------------------------------------------------------------------------------------------------------------------------------------------------------------------------------------------------------------------------------------------------------------------------------------------------------------------------------------------------------------------------------------------------------|------------------------------------------------------------------------------------------------------------------------------------------------------------------------------------------------------------------------------------------------------------------------------------------------------------------------------------------------------------------------------------------------------------------------------------------------------------------------------------------------------------------------------------------------------------------------------------------------------------------------------------------------------------------------------------------------------------------------------------------------------------------------------------------------------------------------------------------------------------------------------------------------------------------------------------------------------------------------------------------------------------------------------------------------------------------------------------------------------------------------------------------------------------------------------------------------------------------------------------------------------------------------------------------------------------------------------------------------------------------------------------|-----------|-----------|--|----------------|------|----------|---------|--------------------------|-----------------------|------------------------|-----------|-------------------------------------------------------------------------------------------------------------------------------------------------------------------------------------------------------------------------------------------------------------------------------|-----------|-------------------------------------------------|--|--|--|-----------|--|--|--|-----------------------------------|----------------------------------|------------------------|---------|----------------------|-----------------------|------------------------|---------|-----------|--|--|--|-----------------------------------|----------------------------------|------------------------|---------|-------------------------|--------------------|------------------------|---------|--|
|                                                                                                                                                                                                                                                                                                                | <ul style="list-style-type: none"> <li>An adverse event (AE) questionnaire was completed every three months for 24 months. The severity, whether the AE was related to SDR and whether the AE was related to cerebral palsy were recorded for each AE, and importantly, each of these were defined a priori. To identify 'sensory changes a qualitative sensory examination of the lower extremities was performed at baseline and 24 months'.</li> </ul> | <table border="1" data-bbox="954 236 1834 304"> <tr> <td><b>Sensory</b></td> <td>4</td> <td>4</td> <td>0</td> <td>0</td> </tr> <tr> <td><b>Total</b></td> <td><b>53</b></td> <td><b>20</b></td> <td><b>48</b></td> <td><b>17</b></td> </tr> </table> <ul style="list-style-type: none"> <li>The following table reports the results of the Ashworth scale analysis used to partially assess spasticity outcomes (along with Spasticity Management System [total path length and elastic path length {Nm:rad}], not reported here):</li> </ul> <table border="1" data-bbox="954 523 1659 927"> <thead> <tr> <th colspan="4">Spasticity outcome: Ashworth Scale change score</th> </tr> <tr> <th colspan="4">12 months</th> </tr> <tr> <th>SDR + PT (n=21)<br/>Median (range)</th> <th>PT only (n=17)<br/>Median (range)</th> <th>Difference<br/>(95% CI)</th> <th>P value</th> </tr> </thead> <tbody> <tr> <td>-0.88<br/>(-2.0 to 0)</td> <td>0.13<br/>(-1.0 to 1.0)</td> <td>-1.0<br/>(-1.3 to -0.7)</td> <td>p&lt;0.001</td> </tr> <tr> <th colspan="4">24 months</th> </tr> <tr> <th>SDR + PT (n=20)<br/>Median (range)</th> <th>PT only (n=17)<br/>Median (range)</th> <th>Difference<br/>(95% CI)</th> <th>P value</th> </tr> <tr> <td>-0.88<br/>(-2.3 to -0.4)</td> <td>0<br/>(-1.0 to 1.3)</td> <td>-1.0<br/>(-1.4 to -0.7)</td> <td>p&lt;0.001</td> </tr> </tbody> </table> |           |           |  | <b>Sensory</b> | 4    | 4        | 0       | 0                        | <b>Total</b>          | <b>53</b>              | <b>20</b> | <b>48</b>                                                                                                                                                                                                                                                                     | <b>17</b> | Spasticity outcome: Ashworth Scale change score |  |  |  | 12 months |  |  |  | SDR + PT (n=21)<br>Median (range) | PT only (n=17)<br>Median (range) | Difference<br>(95% CI) | P value | -0.88<br>(-2.0 to 0) | 0.13<br>(-1.0 to 1.0) | -1.0<br>(-1.3 to -0.7) | p<0.001 | 24 months |  |  |  | SDR + PT (n=20)<br>Median (range) | PT only (n=17)<br>Median (range) | Difference<br>(95% CI) | P value | -0.88<br>(-2.3 to -0.4) | 0<br>(-1.0 to 1.3) | -1.0<br>(-1.4 to -0.7) | p<0.001 |  |
| <b>Sensory</b>                                                                                                                                                                                                                                                                                                 | 4                                                                                                                                                                                                                                                                                                                                                                                                                                                         | 4                                                                                                                                                                                                                                                                                                                                                                                                                                                                                                                                                                                                                                                                                                                                                                                                                                                                                                                                                                                                                                                                                                                                                                                                                                                                                                                                                                                  | 0         | 0         |  |                |      |          |         |                          |                       |                        |           |                                                                                                                                                                                                                                                                               |           |                                                 |  |  |  |           |  |  |  |                                   |                                  |                        |         |                      |                       |                        |         |           |  |  |  |                                   |                                  |                        |         |                         |                    |                        |         |  |
| <b>Total</b>                                                                                                                                                                                                                                                                                                   | <b>53</b>                                                                                                                                                                                                                                                                                                                                                                                                                                                 | <b>20</b>                                                                                                                                                                                                                                                                                                                                                                                                                                                                                                                                                                                                                                                                                                                                                                                                                                                                                                                                                                                                                                                                                                                                                                                                                                                                                                                                                                          | <b>48</b> | <b>17</b> |  |                |      |          |         |                          |                       |                        |           |                                                                                                                                                                                                                                                                               |           |                                                 |  |  |  |           |  |  |  |                                   |                                  |                        |         |                      |                       |                        |         |           |  |  |  |                                   |                                  |                        |         |                         |                    |                        |         |  |
| Spasticity outcome: Ashworth Scale change score                                                                                                                                                                                                                                                                |                                                                                                                                                                                                                                                                                                                                                                                                                                                           |                                                                                                                                                                                                                                                                                                                                                                                                                                                                                                                                                                                                                                                                                                                                                                                                                                                                                                                                                                                                                                                                                                                                                                                                                                                                                                                                                                                    |           |           |  |                |      |          |         |                          |                       |                        |           |                                                                                                                                                                                                                                                                               |           |                                                 |  |  |  |           |  |  |  |                                   |                                  |                        |         |                      |                       |                        |         |           |  |  |  |                                   |                                  |                        |         |                         |                    |                        |         |  |
| 12 months                                                                                                                                                                                                                                                                                                      |                                                                                                                                                                                                                                                                                                                                                                                                                                                           |                                                                                                                                                                                                                                                                                                                                                                                                                                                                                                                                                                                                                                                                                                                                                                                                                                                                                                                                                                                                                                                                                                                                                                                                                                                                                                                                                                                    |           |           |  |                |      |          |         |                          |                       |                        |           |                                                                                                                                                                                                                                                                               |           |                                                 |  |  |  |           |  |  |  |                                   |                                  |                        |         |                      |                       |                        |         |           |  |  |  |                                   |                                  |                        |         |                         |                    |                        |         |  |
| SDR + PT (n=21)<br>Median (range)                                                                                                                                                                                                                                                                              | PT only (n=17)<br>Median (range)                                                                                                                                                                                                                                                                                                                                                                                                                          | Difference<br>(95% CI)                                                                                                                                                                                                                                                                                                                                                                                                                                                                                                                                                                                                                                                                                                                                                                                                                                                                                                                                                                                                                                                                                                                                                                                                                                                                                                                                                             | P value   |           |  |                |      |          |         |                          |                       |                        |           |                                                                                                                                                                                                                                                                               |           |                                                 |  |  |  |           |  |  |  |                                   |                                  |                        |         |                      |                       |                        |         |           |  |  |  |                                   |                                  |                        |         |                         |                    |                        |         |  |
| -0.88<br>(-2.0 to 0)                                                                                                                                                                                                                                                                                           | 0.13<br>(-1.0 to 1.0)                                                                                                                                                                                                                                                                                                                                                                                                                                     | -1.0<br>(-1.3 to -0.7)                                                                                                                                                                                                                                                                                                                                                                                                                                                                                                                                                                                                                                                                                                                                                                                                                                                                                                                                                                                                                                                                                                                                                                                                                                                                                                                                                             | p<0.001   |           |  |                |      |          |         |                          |                       |                        |           |                                                                                                                                                                                                                                                                               |           |                                                 |  |  |  |           |  |  |  |                                   |                                  |                        |         |                      |                       |                        |         |           |  |  |  |                                   |                                  |                        |         |                         |                    |                        |         |  |
| 24 months                                                                                                                                                                                                                                                                                                      |                                                                                                                                                                                                                                                                                                                                                                                                                                                           |                                                                                                                                                                                                                                                                                                                                                                                                                                                                                                                                                                                                                                                                                                                                                                                                                                                                                                                                                                                                                                                                                                                                                                                                                                                                                                                                                                                    |           |           |  |                |      |          |         |                          |                       |                        |           |                                                                                                                                                                                                                                                                               |           |                                                 |  |  |  |           |  |  |  |                                   |                                  |                        |         |                      |                       |                        |         |           |  |  |  |                                   |                                  |                        |         |                         |                    |                        |         |  |
| SDR + PT (n=20)<br>Median (range)                                                                                                                                                                                                                                                                              | PT only (n=17)<br>Median (range)                                                                                                                                                                                                                                                                                                                                                                                                                          | Difference<br>(95% CI)                                                                                                                                                                                                                                                                                                                                                                                                                                                                                                                                                                                                                                                                                                                                                                                                                                                                                                                                                                                                                                                                                                                                                                                                                                                                                                                                                             | P value   |           |  |                |      |          |         |                          |                       |                        |           |                                                                                                                                                                                                                                                                               |           |                                                 |  |  |  |           |  |  |  |                                   |                                  |                        |         |                      |                       |                        |         |           |  |  |  |                                   |                                  |                        |         |                         |                    |                        |         |  |
| -0.88<br>(-2.3 to -0.4)                                                                                                                                                                                                                                                                                        | 0<br>(-1.0 to 1.3)                                                                                                                                                                                                                                                                                                                                                                                                                                        | -1.0<br>(-1.4 to -0.7)                                                                                                                                                                                                                                                                                                                                                                                                                                                                                                                                                                                                                                                                                                                                                                                                                                                                                                                                                                                                                                                                                                                                                                                                                                                                                                                                                             | p<0.001   |           |  |                |      |          |         |                          |                       |                        |           |                                                                                                                                                                                                                                                                               |           |                                                 |  |  |  |           |  |  |  |                                   |                                  |                        |         |                      |                       |                        |         |           |  |  |  |                                   |                                  |                        |         |                         |                    |                        |         |  |
| <p>Steinbok et al. (1997)<sup>9</sup></p> <p>Note: part of meta-analysis by McLaughlin et al. (2002)<sup>1</sup></p> <ul style="list-style-type: none"> <li>RCT, single-centre.</li> <li>Vancouver, British Columbia, Canada.</li> <li>n=30 children randomised to either SPR plus physiotherapy or</li> </ul> | <ul style="list-style-type: none"> <li>Patients randomised to physiotherapy only group were later offered SPR. Randomisation was performed by 'independent party not involved with the care of the patient'.</li> <li>Outcomes assessed included 'GMFM, Physiological Cost</li> </ul>                                                                                                                                                                     | <ul style="list-style-type: none"> <li>The mean increase in total GMFM score from baseline to 9 months was reported as 11.3% (95%CI: 7.4 to 15.2) for the SPR group and 5.2% (95% CI: 3.1 to 7.2) for the control group, with a statistically significant difference of mean change of 6.1% (p=0.007).</li> <li>Authors noted all children in the control group went on to have SPR after the study finished.</li> <li>The following secondary outcomes were assessed using the change from baseline to 9 months in an independent t-test analysis:</li> </ul> <table border="1" data-bbox="954 1262 1809 1362"> <thead> <tr> <th>Assessment</th> <th>SPR*</th> <th>Control*</th> <th>P value</th> </tr> </thead> <tbody> <tr> <td>Physiological Cost Index</td> <td>n=6 (m=-0.3, SD=0.15)</td> <td>n=5 (m=-0.27, SD=0.48)</td> <td>p=0.89</td> </tr> </tbody> </table>                                                                                                                                                                                                                                                                                                                                                                                                                                                                                                            |           |           |  | Assessment     | SPR* | Control* | P value | Physiological Cost Index | n=6 (m=-0.3, SD=0.15) | n=5 (m=-0.27, SD=0.48) | p=0.89    | <ul style="list-style-type: none"> <li>Method of calculating mean rootlet cut was not described.</li> <li>Raw GMFM scores for every child in both groups were reported. These are GMFM-88 scores.</li> <li>No paired t-test for within group GMFM total score from</li> </ul> |           |                                                 |  |  |  |           |  |  |  |                                   |                                  |                        |         |                      |                       |                        |         |           |  |  |  |                                   |                                  |                        |         |                         |                    |                        |         |  |
| Assessment                                                                                                                                                                                                                                                                                                     | SPR*                                                                                                                                                                                                                                                                                                                                                                                                                                                      | Control*                                                                                                                                                                                                                                                                                                                                                                                                                                                                                                                                                                                                                                                                                                                                                                                                                                                                                                                                                                                                                                                                                                                                                                                                                                                                                                                                                                           | P value   |           |  |                |      |          |         |                          |                       |                        |           |                                                                                                                                                                                                                                                                               |           |                                                 |  |  |  |           |  |  |  |                                   |                                  |                        |         |                      |                       |                        |         |           |  |  |  |                                   |                                  |                        |         |                         |                    |                        |         |  |
| Physiological Cost Index                                                                                                                                                                                                                                                                                       | n=6 (m=-0.3, SD=0.15)                                                                                                                                                                                                                                                                                                                                                                                                                                     | n=5 (m=-0.27, SD=0.48)                                                                                                                                                                                                                                                                                                                                                                                                                                                                                                                                                                                                                                                                                                                                                                                                                                                                                                                                                                                                                                                                                                                                                                                                                                                                                                                                                             | p=0.89    |           |  |                |      |          |         |                          |                       |                        |           |                                                                                                                                                                                                                                                                               |           |                                                 |  |  |  |           |  |  |  |                                   |                                  |                        |         |                      |                       |                        |         |           |  |  |  |                                   |                                  |                        |         |                         |                    |                        |         |  |

| Reference & Study details                                                                                                                                                                                                                                                                                                                                                                                                                                                                                                                                                                                                                                                                                                     | Overview/Methodologies                                                                                                                                                                                                                                                                                                                                                                                                                                                                                                                                                                                                                                                                                                                                          | Key efficacy and safety findings  |                        |                        |         | Comments                                                                                                                                                                                                                                                                                   |
|-------------------------------------------------------------------------------------------------------------------------------------------------------------------------------------------------------------------------------------------------------------------------------------------------------------------------------------------------------------------------------------------------------------------------------------------------------------------------------------------------------------------------------------------------------------------------------------------------------------------------------------------------------------------------------------------------------------------------------|-----------------------------------------------------------------------------------------------------------------------------------------------------------------------------------------------------------------------------------------------------------------------------------------------------------------------------------------------------------------------------------------------------------------------------------------------------------------------------------------------------------------------------------------------------------------------------------------------------------------------------------------------------------------------------------------------------------------------------------------------------------------|-----------------------------------|------------------------|------------------------|---------|--------------------------------------------------------------------------------------------------------------------------------------------------------------------------------------------------------------------------------------------------------------------------------------------|
| <p>physiotherapy only. Two patients dropped out (one in each group).</p> <ul style="list-style-type: none"> <li>Children in the SPR group were aged 35 to 75 months (mean 50 months, median 47 months), and children in physiotherapy only group (control) were aged 35 to 77 months (mean 47 months, median 42 months).</li> <li>Assessed at baseline, 3, 6 and 9 months.</li> <li>For children who underwent SPR, mean posterior root cuts were 58% for L2, L3, L5 and S1. Mean rootlet cut for L4 was 42% and mean rootlet cut for S2 was 40%.</li> <li>For children who underwent SPR, discharge from hospital occurred on the 6<sup>th</sup> day post-SPR, and mobilization begun after 48 hours of bed rest.</li> </ul> | <p><i>Index, Peabody Fine Motor Scale, self-care assessment score and 10 measures of range, spasticity and strength</i>'.</p> <ul style="list-style-type: none"> <li>Authors noted no significant difference between the two groups at baseline.</li> <li>Total no. of hours of physiotherapy for SPR groups averaged 81.8 hours (range 72 to 90 hours) and for control group averaged 81.3 hours (range 70 to 89 hours). Authors reported that the control group received physiotherapy within one month of being assigned, and received the same amount and type of physiotherapy as the SPR group.</li> <li>Children were dressed in one-piece leotards for all physiotherapy sessions/assessments, so that physiotherapist was not made aware of</li> </ul> | Peabody Score                     | n=14 (m=22.4, SD=20.2) | n=14 (m=17.4, SD=15.4) | p=0.48  | <p>baseline to 9 months was provided.</p> <ul style="list-style-type: none"> <li>Ashworth scale score was analysed as a continuous variable.</li> <li>Secondary outcomes were not reported with 95% confidence intervals.</li> <li>Adverse events are reported for both groups.</li> </ul> |
|                                                                                                                                                                                                                                                                                                                                                                                                                                                                                                                                                                                                                                                                                                                               |                                                                                                                                                                                                                                                                                                                                                                                                                                                                                                                                                                                                                                                                                                                                                                 | Self-care assessment score        | n=14 (m=10.5, SD=10.1) | n=14 (m=11.5, SD=7.5)  | p=0.78  |                                                                                                                                                                                                                                                                                            |
|                                                                                                                                                                                                                                                                                                                                                                                                                                                                                                                                                                                                                                                                                                                               |                                                                                                                                                                                                                                                                                                                                                                                                                                                                                                                                                                                                                                                                                                                                                                 | <b>Spasticity (Ashworth)</b>      |                        |                        |         |                                                                                                                                                                                                                                                                                            |
|                                                                                                                                                                                                                                                                                                                                                                                                                                                                                                                                                                                                                                                                                                                               |                                                                                                                                                                                                                                                                                                                                                                                                                                                                                                                                                                                                                                                                                                                                                                 | Hip adductors                     | n=14 (m=-1.4, SD=0.6)  | n=14 (m=-0.3, SD=0.6)  | p<0.001 |                                                                                                                                                                                                                                                                                            |
|                                                                                                                                                                                                                                                                                                                                                                                                                                                                                                                                                                                                                                                                                                                               |                                                                                                                                                                                                                                                                                                                                                                                                                                                                                                                                                                                                                                                                                                                                                                 | Knee flexors                      | n=14 (m=-1.1, SD=0.5)  | n=14 (m=-0.1, SD=0.7)  |         |                                                                                                                                                                                                                                                                                            |
|                                                                                                                                                                                                                                                                                                                                                                                                                                                                                                                                                                                                                                                                                                                               |                                                                                                                                                                                                                                                                                                                                                                                                                                                                                                                                                                                                                                                                                                                                                                 | Ankle plantar flexors             | n=14 (m=-1.5, SD=0.6)  | n=14 (m=0, SD=0.8)     |         |                                                                                                                                                                                                                                                                                            |
|                                                                                                                                                                                                                                                                                                                                                                                                                                                                                                                                                                                                                                                                                                                               |                                                                                                                                                                                                                                                                                                                                                                                                                                                                                                                                                                                                                                                                                                                                                                 | <b>Range of motion (degrees)</b>  |                        |                        |         |                                                                                                                                                                                                                                                                                            |
|                                                                                                                                                                                                                                                                                                                                                                                                                                                                                                                                                                                                                                                                                                                               |                                                                                                                                                                                                                                                                                                                                                                                                                                                                                                                                                                                                                                                                                                                                                                 | Hip adductors                     | n=14 (m=15.8, SD=10.6) | n=14 (m=-3.3, SD=8.6)  | p<0.001 |                                                                                                                                                                                                                                                                                            |
|                                                                                                                                                                                                                                                                                                                                                                                                                                                                                                                                                                                                                                                                                                                               |                                                                                                                                                                                                                                                                                                                                                                                                                                                                                                                                                                                                                                                                                                                                                                 | Knee flexors                      | n=14 (m=15.6, SD=15.6) | n=14 (m=-2.1, SD=10.9) |         |                                                                                                                                                                                                                                                                                            |
|                                                                                                                                                                                                                                                                                                                                                                                                                                                                                                                                                                                                                                                                                                                               |                                                                                                                                                                                                                                                                                                                                                                                                                                                                                                                                                                                                                                                                                                                                                                 | Ankle plantar flexors             | n=7 (m=18, SD=5.9)     | n=2 (m=17.5, SD=14.1)  |         |                                                                                                                                                                                                                                                                                            |
|                                                                                                                                                                                                                                                                                                                                                                                                                                                                                                                                                                                                                                                                                                                               |                                                                                                                                                                                                                                                                                                                                                                                                                                                                                                                                                                                                                                                                                                                                                                 | <b>Muscle strength (kg force)</b> |                        |                        |         |                                                                                                                                                                                                                                                                                            |
|                                                                                                                                                                                                                                                                                                                                                                                                                                                                                                                                                                                                                                                                                                                               |                                                                                                                                                                                                                                                                                                                                                                                                                                                                                                                                                                                                                                                                                                                                                                 | Knee extensors                    | n=5 (m=0.2, SD=1.5)    | n=5 (m=0.7, SD=1.5)    | p=0.64  |                                                                                                                                                                                                                                                                                            |
|                                                                                                                                                                                                                                                                                                                                                                                                                                                                                                                                                                                                                                                                                                                               |                                                                                                                                                                                                                                                                                                                                                                                                                                                                                                                                                                                                                                                                                                                                                                 | Hip abductors                     | n=5 (m=0.5, SD=1.2)    | n=5 (m=-0.2, SD=0.6)   |         |                                                                                                                                                                                                                                                                                            |
|                                                                                                                                                                                                                                                                                                                                                                                                                                                                                                                                                                                                                                                                                                                               |                                                                                                                                                                                                                                                                                                                                                                                                                                                                                                                                                                                                                                                                                                                                                                 | Hip extensors                     | n=5 (m=0.9, SD=1.0)    | n=5 (m=0.5, SD=1.2)    |         |                                                                                                                                                                                                                                                                                            |
|                                                                                                                                                                                                                                                                                                                                                                                                                                                                                                                                                                                                                                                                                                                               |                                                                                                                                                                                                                                                                                                                                                                                                                                                                                                                                                                                                                                                                                                                                                                 | Ankle dorsiflexors                | n=5 (m=1.3, SD=1.1)    | n=5 (m=0.6, SD=1.4)    |         |                                                                                                                                                                                                                                                                                            |
| *n=number of subjects assessed, m=mean change, sd=standard deviation                                                                                                                                                                                                                                                                                                                                                                                                                                                                                                                                                                                                                                                          |                                                                                                                                                                                                                                                                                                                                                                                                                                                                                                                                                                                                                                                                                                                                                                 |                                   |                        |                        |         |                                                                                                                                                                                                                                                                                            |
| <ul style="list-style-type: none"> <li>The authors noted that 'no patient on the study was given additional therapies outside the prescribed study protocol'.</li> <li>No complications were reported for the control (physiotherapy only) group.</li> </ul>                                                                                                                                                                                                                                                                                                                                                                                                                                                                  |                                                                                                                                                                                                                                                                                                                                                                                                                                                                                                                                                                                                                                                                                                                                                                 |                                   |                        |                        |         |                                                                                                                                                                                                                                                                                            |

| Reference & Study details                                                                                                                                                                                                         | Overview/Methodologies                                                                                                                                                                                                                                                                                                                                                                                                                                                                                                                         | Key efficacy and safety findings                                                                                                                                                                                                                                                                                                                                                                                                                                                        | Comments                                                                                                                                                                                       |
|-----------------------------------------------------------------------------------------------------------------------------------------------------------------------------------------------------------------------------------|------------------------------------------------------------------------------------------------------------------------------------------------------------------------------------------------------------------------------------------------------------------------------------------------------------------------------------------------------------------------------------------------------------------------------------------------------------------------------------------------------------------------------------------------|-----------------------------------------------------------------------------------------------------------------------------------------------------------------------------------------------------------------------------------------------------------------------------------------------------------------------------------------------------------------------------------------------------------------------------------------------------------------------------------------|------------------------------------------------------------------------------------------------------------------------------------------------------------------------------------------------|
|                                                                                                                                                                                                                                   | <p>the treatment group that child was in.</p> <ul style="list-style-type: none"> <li>• Analysis consisted of t-tests for independent mean GMFM total score change (baseline to 9 months) between the two groups.</li> <li>• Secondary outcomes with continuous data were analysed with t tests for independent means.</li> <li>• Bonferroni correction for multiple corrections was used when comparing one measure each of spasticity (hip adductors), range of motion - ROM (hip abduction) and muscle strength (knee extensors).</li> </ul> | <ul style="list-style-type: none"> <li>• One post-operative infection (spinal epidural abscess) and one case of transient urinary retention which lasted to the 4<sup>th</sup> day post-SPR were reported. There also one report of back pain in the SPR group (duration of 2 days and occurred 9 months after SPR).</li> </ul>                                                                                                                                                         |                                                                                                                                                                                                |
| <p>Wright et al. (1998)<sup>10</sup></p> <p>Note: part of meta-analysis by McLaughlin et al. (2002)<sup>1</sup></p> <ul style="list-style-type: none"> <li>• RCT</li> <li>• MacMillan Centre, Toronto, Ontario, Canada</li> </ul> | <ul style="list-style-type: none"> <li>• All children had individualised therapy goals pre-randomisation. Control group therapy goals remained unchanged to limit bias.</li> </ul>                                                                                                                                                                                                                                                                                                                                                             | <ul style="list-style-type: none"> <li>• The authors noted '<i>no major negative effects were detected following the SDR procedure. There were no complaints of sensory changes or bladder dysfunction</i>'. The authors noted that 'one child suffered from a urinary tract infection post operatively, this was associated with the indwelling Foley catheter'.</li> <li>• There were no significant differences in the age and gender of the children between the groups.</li> </ul> | <ul style="list-style-type: none"> <li>• No GMFCS levels reported.</li> <li>• Limited information about baseline characteristics are provided, for example, age when receiving SDR.</li> </ul> |

| Reference & Study details                                                                                                                                                                                                                                                                                                                                                                                                        | Overview/Methodologies                                                                                                                                                                                                                                                                                                                                                                                                                                                                                                                                                                                                                                         | Key efficacy and safety findings                                                                                                                                                                                                                                                                                                                                                                                                                                                                                                                                                                                                                                                                                                                                                                                                                                                                                                                                                                                                                                                                                                                                                                                                                                                                                                                                                                                                                                                                                                                                                                                                                                                                                                                                                                                                                                                                                                                                                                                                                                                                                                                                                                                                                                                                                                                                                                                                                                                                                                                                                                                                                                                                                                                                                                                                                                                                                                                                                                                                                                                                                                                                                                                                                                                                                                                                                                                                                                                                                                                                                                                                                                                                                                                                                                                                                                                                                                                                                                                                                                                                                                                                                                                                                                                                                             | Comments                                                                                                  |  |  |  |                |                  |                 |  |  |                       |           |           |          |            |            |     |             |             |             |             |             |       |             |             |               |             |            |              |                    |                    |                 |  |  |          |            |            |     |             |             |             |             |             |       |              |              |               |              |            |              |                    |                    |                  |  |  |          |            |            |     |             |             |             |             |             |       |             |             |               |              |              |              |                     |                     |                                                                                                                                                                                                                                                                                                                                                                                                                                                                                                                                                                                                                                                                                                                      |
|----------------------------------------------------------------------------------------------------------------------------------------------------------------------------------------------------------------------------------------------------------------------------------------------------------------------------------------------------------------------------------------------------------------------------------|----------------------------------------------------------------------------------------------------------------------------------------------------------------------------------------------------------------------------------------------------------------------------------------------------------------------------------------------------------------------------------------------------------------------------------------------------------------------------------------------------------------------------------------------------------------------------------------------------------------------------------------------------------------|------------------------------------------------------------------------------------------------------------------------------------------------------------------------------------------------------------------------------------------------------------------------------------------------------------------------------------------------------------------------------------------------------------------------------------------------------------------------------------------------------------------------------------------------------------------------------------------------------------------------------------------------------------------------------------------------------------------------------------------------------------------------------------------------------------------------------------------------------------------------------------------------------------------------------------------------------------------------------------------------------------------------------------------------------------------------------------------------------------------------------------------------------------------------------------------------------------------------------------------------------------------------------------------------------------------------------------------------------------------------------------------------------------------------------------------------------------------------------------------------------------------------------------------------------------------------------------------------------------------------------------------------------------------------------------------------------------------------------------------------------------------------------------------------------------------------------------------------------------------------------------------------------------------------------------------------------------------------------------------------------------------------------------------------------------------------------------------------------------------------------------------------------------------------------------------------------------------------------------------------------------------------------------------------------------------------------------------------------------------------------------------------------------------------------------------------------------------------------------------------------------------------------------------------------------------------------------------------------------------------------------------------------------------------------------------------------------------------------------------------------------------------------------------------------------------------------------------------------------------------------------------------------------------------------------------------------------------------------------------------------------------------------------------------------------------------------------------------------------------------------------------------------------------------------------------------------------------------------------------------------------------------------------------------------------------------------------------------------------------------------------------------------------------------------------------------------------------------------------------------------------------------------------------------------------------------------------------------------------------------------------------------------------------------------------------------------------------------------------------------------------------------------------------------------------------------------------------------------------------------------------------------------------------------------------------------------------------------------------------------------------------------------------------------------------------------------------------------------------------------------------------------------------------------------------------------------------------------------------------------------------------------------------------------------------------------------|-----------------------------------------------------------------------------------------------------------|--|--|--|----------------|------------------|-----------------|--|--|-----------------------|-----------|-----------|----------|------------|------------|-----|-------------|-------------|-------------|-------------|-------------|-------|-------------|-------------|---------------|-------------|------------|--------------|--------------------|--------------------|-----------------|--|--|----------|------------|------------|-----|-------------|-------------|-------------|-------------|-------------|-------|--------------|--------------|---------------|--------------|------------|--------------|--------------------|--------------------|------------------|--|--|----------|------------|------------|-----|-------------|-------------|-------------|-------------|-------------|-------|-------------|-------------|---------------|--------------|--------------|--------------|---------------------|---------------------|----------------------------------------------------------------------------------------------------------------------------------------------------------------------------------------------------------------------------------------------------------------------------------------------------------------------------------------------------------------------------------------------------------------------------------------------------------------------------------------------------------------------------------------------------------------------------------------------------------------------------------------------------------------------------------------------------------------------|
| <ul style="list-style-type: none"> <li>• 24 children (10 females, 14 males) with spastic diplegic cerebral palsy. Mean age of 58 months.</li> <li>• Patients randomised to SDR and physiotherapy only groups. There were 12 children per group.</li> <li>• Outcomes were measured at baseline, 6 and 12 months for both patient groups.</li> <li>• 'The minimum age was 41 months and the maximum age was 91 months'.</li> </ul> | <ul style="list-style-type: none"> <li>• Therapy goals for intervention group changed after SDR, created by inpatient/occupational therapist group at the centre.</li> <li>• The control group received equivalent physiotherapy and occupational therapy. However, the rhizotomy group received a 6-week post-operative inpatient therapy programme.</li> <li>• L2 to S2 were isolated. Once it was established that these rootlets were functional 'they were subdivided along natural planes into between 2 and 6 rootlets' by the size of the root.</li> <li>• The authors noted that 'on average, approximately 50% of each root was divided'.</li> </ul> | <ul style="list-style-type: none"> <li>• The authors reported that there was a 'correlation between GMFM total baseline scores and GMFM total 12 months change scores (<math>r=-0.32</math>)'.</li> <li>• The main GMFM (88) scores are reproduced in the below table:</li> </ul> <table border="1" data-bbox="954 379 1615 1270"> <thead> <tr> <th colspan="3" data-bbox="954 379 1615 448">GMFM scores (percentage points) by category for each group at baseline, 6 months and 12 month assessments</th> </tr> <tr> <th data-bbox="954 448 1182 488"></th> <th data-bbox="1182 448 1391 488">Control (n=12)</th> <th data-bbox="1391 448 1615 488">Rhizotomy (n=12)</th> </tr> </thead> <tbody> <tr> <td colspan="3" data-bbox="954 488 1615 528"><b>Baseline</b></td> </tr> <tr> <td data-bbox="954 528 1182 568"><b>GMFM dimension</b></td> <td data-bbox="1182 528 1391 568">Mean (SD)</td> <td data-bbox="1391 528 1615 568">Mean (SD)</td> </tr> <tr> <td data-bbox="954 568 1182 608">Lie/roll</td> <td data-bbox="1182 568 1391 608">91.2 (8.3)</td> <td data-bbox="1391 568 1615 608">92.8 (9.4)</td> </tr> <tr> <td data-bbox="954 608 1182 647">Sit</td> <td data-bbox="1182 608 1391 647">83.7 (16.1)</td> <td data-bbox="1391 608 1615 647">74.3 (22.2)</td> </tr> <tr> <td data-bbox="954 647 1182 687">Crawl/kneel</td> <td data-bbox="1182 647 1391 687">71.1 (19.4)</td> <td data-bbox="1391 647 1615 687">62.9 (26.9)</td> </tr> <tr> <td data-bbox="954 687 1182 727">Stand</td> <td data-bbox="1182 687 1391 727">19.6 (17.2)</td> <td data-bbox="1391 687 1615 727">21.8 (15.9)</td> </tr> <tr> <td data-bbox="954 727 1182 767">Walk/run/jump</td> <td data-bbox="1182 727 1391 767">13.2 (14.2)</td> <td data-bbox="1391 727 1615 767">10.6 (8.2)</td> </tr> <tr> <td data-bbox="954 767 1182 807"><b>Total</b></td> <td data-bbox="1182 767 1391 807"><b>56.5 (12.2)</b></td> <td data-bbox="1391 767 1615 807"><b>51.9 (13.4)</b></td> </tr> <tr> <td colspan="3" data-bbox="954 807 1615 847"><b>6 months</b></td> </tr> <tr> <td data-bbox="954 847 1182 887">Lie/roll</td> <td data-bbox="1182 847 1391 887">95.9 (2.8)</td> <td data-bbox="1391 847 1615 887">94.4 (6.7)</td> </tr> <tr> <td data-bbox="954 887 1182 927">Sit</td> <td data-bbox="1182 887 1391 927">85.6 (17.9)</td> <td data-bbox="1391 887 1615 927">87.9 (15.1)</td> </tr> <tr> <td data-bbox="954 927 1182 967">Crawl/kneel</td> <td data-bbox="1182 927 1391 967">76.3 (15.8)</td> <td data-bbox="1391 927 1615 967">68.4 (24.0)</td> </tr> <tr> <td data-bbox="954 967 1182 1007">Stand</td> <td data-bbox="1182 967 1391 1007">23.7 (12.1)*</td> <td data-bbox="1391 967 1615 1007">30.1 (23.4)*</td> </tr> <tr> <td data-bbox="954 1007 1182 1046">Walk/run/jump</td> <td data-bbox="1182 1007 1391 1046">114.5 (15.4)</td> <td data-bbox="1391 1007 1615 1046">14.8 (7.8)</td> </tr> <tr> <td data-bbox="954 1046 1182 1086"><b>Total</b></td> <td data-bbox="1182 1046 1391 1086"><b>58.5 (10.7)</b></td> <td data-bbox="1391 1046 1615 1086"><b>58.7 (13.5)</b></td> </tr> <tr> <td colspan="3" data-bbox="954 1086 1615 1126"><b>12 months</b></td> </tr> <tr> <td data-bbox="954 1126 1182 1166">Lie/roll</td> <td data-bbox="1182 1126 1391 1166">96.2 (3.1)</td> <td data-bbox="1391 1126 1615 1166">98.7 (1.9)</td> </tr> <tr> <td data-bbox="954 1166 1182 1206">Sit</td> <td data-bbox="1182 1166 1391 1206">87.9 (15.8)</td> <td data-bbox="1391 1166 1615 1206">87.7 (15.2)</td> </tr> <tr> <td data-bbox="954 1206 1182 1246">Crawl/kneel</td> <td data-bbox="1182 1206 1391 1246">76.9 (10.4)</td> <td data-bbox="1391 1206 1615 1246">77.3 (19.2)</td> </tr> <tr> <td data-bbox="954 1246 1182 1286">Stand</td> <td data-bbox="1182 1246 1391 1286">27.1 (19.6)</td> <td data-bbox="1391 1246 1615 1286">33.1 (23.5)</td> </tr> <tr> <td data-bbox="954 1286 1182 1326">Walk/run/jump</td> <td data-bbox="1182 1286 1391 1326">15.7 (17.1)*</td> <td data-bbox="1391 1286 1615 1326">23.4 (19.5)*</td> </tr> <tr> <td data-bbox="954 1326 1182 1366"><b>Total</b></td> <td data-bbox="1182 1326 1391 1366"><b>60.9 (12.5)*</b></td> <td data-bbox="1391 1326 1615 1366"><b>64.0 (13.2)*</b></td> </tr> </tbody> </table> <p data-bbox="954 1270 1249 1302">*<math>p&lt;0.05</math> between groups</p> | GMFM scores (percentage points) by category for each group at baseline, 6 months and 12 month assessments |  |  |  | Control (n=12) | Rhizotomy (n=12) | <b>Baseline</b> |  |  | <b>GMFM dimension</b> | Mean (SD) | Mean (SD) | Lie/roll | 91.2 (8.3) | 92.8 (9.4) | Sit | 83.7 (16.1) | 74.3 (22.2) | Crawl/kneel | 71.1 (19.4) | 62.9 (26.9) | Stand | 19.6 (17.2) | 21.8 (15.9) | Walk/run/jump | 13.2 (14.2) | 10.6 (8.2) | <b>Total</b> | <b>56.5 (12.2)</b> | <b>51.9 (13.4)</b> | <b>6 months</b> |  |  | Lie/roll | 95.9 (2.8) | 94.4 (6.7) | Sit | 85.6 (17.9) | 87.9 (15.1) | Crawl/kneel | 76.3 (15.8) | 68.4 (24.0) | Stand | 23.7 (12.1)* | 30.1 (23.4)* | Walk/run/jump | 114.5 (15.4) | 14.8 (7.8) | <b>Total</b> | <b>58.5 (10.7)</b> | <b>58.7 (13.5)</b> | <b>12 months</b> |  |  | Lie/roll | 96.2 (3.1) | 98.7 (1.9) | Sit | 87.9 (15.8) | 87.7 (15.2) | Crawl/kneel | 76.9 (10.4) | 77.3 (19.2) | Stand | 27.1 (19.6) | 33.1 (23.5) | Walk/run/jump | 15.7 (17.1)* | 23.4 (19.5)* | <b>Total</b> | <b>60.9 (12.5)*</b> | <b>64.0 (13.2)*</b> | <ul style="list-style-type: none"> <li>• Assessed MAS as a continuous variable.</li> <li>• While no AEs appear to have been reported after the 12-month assessment one participant underwent 'serial casting for tightened ankle plantar flexors 3 years post rhizotomy'</li> <li>• Wright et al. stated that 'the increase in GMFM total scores was 12.1 percentage points in the RG [SDR + physiotherapy group] group and 4.4 percentage points in the CG [physiotherapy only group] (<math>P=0.02</math>)' for their trial. However, as the physiotherapy programmes are different based on whether the child has SDR or not, the physiotherapy only group could be confounding these results, as they</li> </ul> |
| GMFM scores (percentage points) by category for each group at baseline, 6 months and 12 month assessments                                                                                                                                                                                                                                                                                                                        |                                                                                                                                                                                                                                                                                                                                                                                                                                                                                                                                                                                                                                                                |                                                                                                                                                                                                                                                                                                                                                                                                                                                                                                                                                                                                                                                                                                                                                                                                                                                                                                                                                                                                                                                                                                                                                                                                                                                                                                                                                                                                                                                                                                                                                                                                                                                                                                                                                                                                                                                                                                                                                                                                                                                                                                                                                                                                                                                                                                                                                                                                                                                                                                                                                                                                                                                                                                                                                                                                                                                                                                                                                                                                                                                                                                                                                                                                                                                                                                                                                                                                                                                                                                                                                                                                                                                                                                                                                                                                                                                                                                                                                                                                                                                                                                                                                                                                                                                                                                                              |                                                                                                           |  |  |  |                |                  |                 |  |  |                       |           |           |          |            |            |     |             |             |             |             |             |       |             |             |               |             |            |              |                    |                    |                 |  |  |          |            |            |     |             |             |             |             |             |       |              |              |               |              |            |              |                    |                    |                  |  |  |          |            |            |     |             |             |             |             |             |       |             |             |               |              |              |              |                     |                     |                                                                                                                                                                                                                                                                                                                                                                                                                                                                                                                                                                                                                                                                                                                      |
|                                                                                                                                                                                                                                                                                                                                                                                                                                  | Control (n=12)                                                                                                                                                                                                                                                                                                                                                                                                                                                                                                                                                                                                                                                 | Rhizotomy (n=12)                                                                                                                                                                                                                                                                                                                                                                                                                                                                                                                                                                                                                                                                                                                                                                                                                                                                                                                                                                                                                                                                                                                                                                                                                                                                                                                                                                                                                                                                                                                                                                                                                                                                                                                                                                                                                                                                                                                                                                                                                                                                                                                                                                                                                                                                                                                                                                                                                                                                                                                                                                                                                                                                                                                                                                                                                                                                                                                                                                                                                                                                                                                                                                                                                                                                                                                                                                                                                                                                                                                                                                                                                                                                                                                                                                                                                                                                                                                                                                                                                                                                                                                                                                                                                                                                                                             |                                                                                                           |  |  |  |                |                  |                 |  |  |                       |           |           |          |            |            |     |             |             |             |             |             |       |             |             |               |             |            |              |                    |                    |                 |  |  |          |            |            |     |             |             |             |             |             |       |              |              |               |              |            |              |                    |                    |                  |  |  |          |            |            |     |             |             |             |             |             |       |             |             |               |              |              |              |                     |                     |                                                                                                                                                                                                                                                                                                                                                                                                                                                                                                                                                                                                                                                                                                                      |
| <b>Baseline</b>                                                                                                                                                                                                                                                                                                                                                                                                                  |                                                                                                                                                                                                                                                                                                                                                                                                                                                                                                                                                                                                                                                                |                                                                                                                                                                                                                                                                                                                                                                                                                                                                                                                                                                                                                                                                                                                                                                                                                                                                                                                                                                                                                                                                                                                                                                                                                                                                                                                                                                                                                                                                                                                                                                                                                                                                                                                                                                                                                                                                                                                                                                                                                                                                                                                                                                                                                                                                                                                                                                                                                                                                                                                                                                                                                                                                                                                                                                                                                                                                                                                                                                                                                                                                                                                                                                                                                                                                                                                                                                                                                                                                                                                                                                                                                                                                                                                                                                                                                                                                                                                                                                                                                                                                                                                                                                                                                                                                                                                              |                                                                                                           |  |  |  |                |                  |                 |  |  |                       |           |           |          |            |            |     |             |             |             |             |             |       |             |             |               |             |            |              |                    |                    |                 |  |  |          |            |            |     |             |             |             |             |             |       |              |              |               |              |            |              |                    |                    |                  |  |  |          |            |            |     |             |             |             |             |             |       |             |             |               |              |              |              |                     |                     |                                                                                                                                                                                                                                                                                                                                                                                                                                                                                                                                                                                                                                                                                                                      |
| <b>GMFM dimension</b>                                                                                                                                                                                                                                                                                                                                                                                                            | Mean (SD)                                                                                                                                                                                                                                                                                                                                                                                                                                                                                                                                                                                                                                                      | Mean (SD)                                                                                                                                                                                                                                                                                                                                                                                                                                                                                                                                                                                                                                                                                                                                                                                                                                                                                                                                                                                                                                                                                                                                                                                                                                                                                                                                                                                                                                                                                                                                                                                                                                                                                                                                                                                                                                                                                                                                                                                                                                                                                                                                                                                                                                                                                                                                                                                                                                                                                                                                                                                                                                                                                                                                                                                                                                                                                                                                                                                                                                                                                                                                                                                                                                                                                                                                                                                                                                                                                                                                                                                                                                                                                                                                                                                                                                                                                                                                                                                                                                                                                                                                                                                                                                                                                                                    |                                                                                                           |  |  |  |                |                  |                 |  |  |                       |           |           |          |            |            |     |             |             |             |             |             |       |             |             |               |             |            |              |                    |                    |                 |  |  |          |            |            |     |             |             |             |             |             |       |              |              |               |              |            |              |                    |                    |                  |  |  |          |            |            |     |             |             |             |             |             |       |             |             |               |              |              |              |                     |                     |                                                                                                                                                                                                                                                                                                                                                                                                                                                                                                                                                                                                                                                                                                                      |
| Lie/roll                                                                                                                                                                                                                                                                                                                                                                                                                         | 91.2 (8.3)                                                                                                                                                                                                                                                                                                                                                                                                                                                                                                                                                                                                                                                     | 92.8 (9.4)                                                                                                                                                                                                                                                                                                                                                                                                                                                                                                                                                                                                                                                                                                                                                                                                                                                                                                                                                                                                                                                                                                                                                                                                                                                                                                                                                                                                                                                                                                                                                                                                                                                                                                                                                                                                                                                                                                                                                                                                                                                                                                                                                                                                                                                                                                                                                                                                                                                                                                                                                                                                                                                                                                                                                                                                                                                                                                                                                                                                                                                                                                                                                                                                                                                                                                                                                                                                                                                                                                                                                                                                                                                                                                                                                                                                                                                                                                                                                                                                                                                                                                                                                                                                                                                                                                                   |                                                                                                           |  |  |  |                |                  |                 |  |  |                       |           |           |          |            |            |     |             |             |             |             |             |       |             |             |               |             |            |              |                    |                    |                 |  |  |          |            |            |     |             |             |             |             |             |       |              |              |               |              |            |              |                    |                    |                  |  |  |          |            |            |     |             |             |             |             |             |       |             |             |               |              |              |              |                     |                     |                                                                                                                                                                                                                                                                                                                                                                                                                                                                                                                                                                                                                                                                                                                      |
| Sit                                                                                                                                                                                                                                                                                                                                                                                                                              | 83.7 (16.1)                                                                                                                                                                                                                                                                                                                                                                                                                                                                                                                                                                                                                                                    | 74.3 (22.2)                                                                                                                                                                                                                                                                                                                                                                                                                                                                                                                                                                                                                                                                                                                                                                                                                                                                                                                                                                                                                                                                                                                                                                                                                                                                                                                                                                                                                                                                                                                                                                                                                                                                                                                                                                                                                                                                                                                                                                                                                                                                                                                                                                                                                                                                                                                                                                                                                                                                                                                                                                                                                                                                                                                                                                                                                                                                                                                                                                                                                                                                                                                                                                                                                                                                                                                                                                                                                                                                                                                                                                                                                                                                                                                                                                                                                                                                                                                                                                                                                                                                                                                                                                                                                                                                                                                  |                                                                                                           |  |  |  |                |                  |                 |  |  |                       |           |           |          |            |            |     |             |             |             |             |             |       |             |             |               |             |            |              |                    |                    |                 |  |  |          |            |            |     |             |             |             |             |             |       |              |              |               |              |            |              |                    |                    |                  |  |  |          |            |            |     |             |             |             |             |             |       |             |             |               |              |              |              |                     |                     |                                                                                                                                                                                                                                                                                                                                                                                                                                                                                                                                                                                                                                                                                                                      |
| Crawl/kneel                                                                                                                                                                                                                                                                                                                                                                                                                      | 71.1 (19.4)                                                                                                                                                                                                                                                                                                                                                                                                                                                                                                                                                                                                                                                    | 62.9 (26.9)                                                                                                                                                                                                                                                                                                                                                                                                                                                                                                                                                                                                                                                                                                                                                                                                                                                                                                                                                                                                                                                                                                                                                                                                                                                                                                                                                                                                                                                                                                                                                                                                                                                                                                                                                                                                                                                                                                                                                                                                                                                                                                                                                                                                                                                                                                                                                                                                                                                                                                                                                                                                                                                                                                                                                                                                                                                                                                                                                                                                                                                                                                                                                                                                                                                                                                                                                                                                                                                                                                                                                                                                                                                                                                                                                                                                                                                                                                                                                                                                                                                                                                                                                                                                                                                                                                                  |                                                                                                           |  |  |  |                |                  |                 |  |  |                       |           |           |          |            |            |     |             |             |             |             |             |       |             |             |               |             |            |              |                    |                    |                 |  |  |          |            |            |     |             |             |             |             |             |       |              |              |               |              |            |              |                    |                    |                  |  |  |          |            |            |     |             |             |             |             |             |       |             |             |               |              |              |              |                     |                     |                                                                                                                                                                                                                                                                                                                                                                                                                                                                                                                                                                                                                                                                                                                      |
| Stand                                                                                                                                                                                                                                                                                                                                                                                                                            | 19.6 (17.2)                                                                                                                                                                                                                                                                                                                                                                                                                                                                                                                                                                                                                                                    | 21.8 (15.9)                                                                                                                                                                                                                                                                                                                                                                                                                                                                                                                                                                                                                                                                                                                                                                                                                                                                                                                                                                                                                                                                                                                                                                                                                                                                                                                                                                                                                                                                                                                                                                                                                                                                                                                                                                                                                                                                                                                                                                                                                                                                                                                                                                                                                                                                                                                                                                                                                                                                                                                                                                                                                                                                                                                                                                                                                                                                                                                                                                                                                                                                                                                                                                                                                                                                                                                                                                                                                                                                                                                                                                                                                                                                                                                                                                                                                                                                                                                                                                                                                                                                                                                                                                                                                                                                                                                  |                                                                                                           |  |  |  |                |                  |                 |  |  |                       |           |           |          |            |            |     |             |             |             |             |             |       |             |             |               |             |            |              |                    |                    |                 |  |  |          |            |            |     |             |             |             |             |             |       |              |              |               |              |            |              |                    |                    |                  |  |  |          |            |            |     |             |             |             |             |             |       |             |             |               |              |              |              |                     |                     |                                                                                                                                                                                                                                                                                                                                                                                                                                                                                                                                                                                                                                                                                                                      |
| Walk/run/jump                                                                                                                                                                                                                                                                                                                                                                                                                    | 13.2 (14.2)                                                                                                                                                                                                                                                                                                                                                                                                                                                                                                                                                                                                                                                    | 10.6 (8.2)                                                                                                                                                                                                                                                                                                                                                                                                                                                                                                                                                                                                                                                                                                                                                                                                                                                                                                                                                                                                                                                                                                                                                                                                                                                                                                                                                                                                                                                                                                                                                                                                                                                                                                                                                                                                                                                                                                                                                                                                                                                                                                                                                                                                                                                                                                                                                                                                                                                                                                                                                                                                                                                                                                                                                                                                                                                                                                                                                                                                                                                                                                                                                                                                                                                                                                                                                                                                                                                                                                                                                                                                                                                                                                                                                                                                                                                                                                                                                                                                                                                                                                                                                                                                                                                                                                                   |                                                                                                           |  |  |  |                |                  |                 |  |  |                       |           |           |          |            |            |     |             |             |             |             |             |       |             |             |               |             |            |              |                    |                    |                 |  |  |          |            |            |     |             |             |             |             |             |       |              |              |               |              |            |              |                    |                    |                  |  |  |          |            |            |     |             |             |             |             |             |       |             |             |               |              |              |              |                     |                     |                                                                                                                                                                                                                                                                                                                                                                                                                                                                                                                                                                                                                                                                                                                      |
| <b>Total</b>                                                                                                                                                                                                                                                                                                                                                                                                                     | <b>56.5 (12.2)</b>                                                                                                                                                                                                                                                                                                                                                                                                                                                                                                                                                                                                                                             | <b>51.9 (13.4)</b>                                                                                                                                                                                                                                                                                                                                                                                                                                                                                                                                                                                                                                                                                                                                                                                                                                                                                                                                                                                                                                                                                                                                                                                                                                                                                                                                                                                                                                                                                                                                                                                                                                                                                                                                                                                                                                                                                                                                                                                                                                                                                                                                                                                                                                                                                                                                                                                                                                                                                                                                                                                                                                                                                                                                                                                                                                                                                                                                                                                                                                                                                                                                                                                                                                                                                                                                                                                                                                                                                                                                                                                                                                                                                                                                                                                                                                                                                                                                                                                                                                                                                                                                                                                                                                                                                                           |                                                                                                           |  |  |  |                |                  |                 |  |  |                       |           |           |          |            |            |     |             |             |             |             |             |       |             |             |               |             |            |              |                    |                    |                 |  |  |          |            |            |     |             |             |             |             |             |       |              |              |               |              |            |              |                    |                    |                  |  |  |          |            |            |     |             |             |             |             |             |       |             |             |               |              |              |              |                     |                     |                                                                                                                                                                                                                                                                                                                                                                                                                                                                                                                                                                                                                                                                                                                      |
| <b>6 months</b>                                                                                                                                                                                                                                                                                                                                                                                                                  |                                                                                                                                                                                                                                                                                                                                                                                                                                                                                                                                                                                                                                                                |                                                                                                                                                                                                                                                                                                                                                                                                                                                                                                                                                                                                                                                                                                                                                                                                                                                                                                                                                                                                                                                                                                                                                                                                                                                                                                                                                                                                                                                                                                                                                                                                                                                                                                                                                                                                                                                                                                                                                                                                                                                                                                                                                                                                                                                                                                                                                                                                                                                                                                                                                                                                                                                                                                                                                                                                                                                                                                                                                                                                                                                                                                                                                                                                                                                                                                                                                                                                                                                                                                                                                                                                                                                                                                                                                                                                                                                                                                                                                                                                                                                                                                                                                                                                                                                                                                                              |                                                                                                           |  |  |  |                |                  |                 |  |  |                       |           |           |          |            |            |     |             |             |             |             |             |       |             |             |               |             |            |              |                    |                    |                 |  |  |          |            |            |     |             |             |             |             |             |       |              |              |               |              |            |              |                    |                    |                  |  |  |          |            |            |     |             |             |             |             |             |       |             |             |               |              |              |              |                     |                     |                                                                                                                                                                                                                                                                                                                                                                                                                                                                                                                                                                                                                                                                                                                      |
| Lie/roll                                                                                                                                                                                                                                                                                                                                                                                                                         | 95.9 (2.8)                                                                                                                                                                                                                                                                                                                                                                                                                                                                                                                                                                                                                                                     | 94.4 (6.7)                                                                                                                                                                                                                                                                                                                                                                                                                                                                                                                                                                                                                                                                                                                                                                                                                                                                                                                                                                                                                                                                                                                                                                                                                                                                                                                                                                                                                                                                                                                                                                                                                                                                                                                                                                                                                                                                                                                                                                                                                                                                                                                                                                                                                                                                                                                                                                                                                                                                                                                                                                                                                                                                                                                                                                                                                                                                                                                                                                                                                                                                                                                                                                                                                                                                                                                                                                                                                                                                                                                                                                                                                                                                                                                                                                                                                                                                                                                                                                                                                                                                                                                                                                                                                                                                                                                   |                                                                                                           |  |  |  |                |                  |                 |  |  |                       |           |           |          |            |            |     |             |             |             |             |             |       |             |             |               |             |            |              |                    |                    |                 |  |  |          |            |            |     |             |             |             |             |             |       |              |              |               |              |            |              |                    |                    |                  |  |  |          |            |            |     |             |             |             |             |             |       |             |             |               |              |              |              |                     |                     |                                                                                                                                                                                                                                                                                                                                                                                                                                                                                                                                                                                                                                                                                                                      |
| Sit                                                                                                                                                                                                                                                                                                                                                                                                                              | 85.6 (17.9)                                                                                                                                                                                                                                                                                                                                                                                                                                                                                                                                                                                                                                                    | 87.9 (15.1)                                                                                                                                                                                                                                                                                                                                                                                                                                                                                                                                                                                                                                                                                                                                                                                                                                                                                                                                                                                                                                                                                                                                                                                                                                                                                                                                                                                                                                                                                                                                                                                                                                                                                                                                                                                                                                                                                                                                                                                                                                                                                                                                                                                                                                                                                                                                                                                                                                                                                                                                                                                                                                                                                                                                                                                                                                                                                                                                                                                                                                                                                                                                                                                                                                                                                                                                                                                                                                                                                                                                                                                                                                                                                                                                                                                                                                                                                                                                                                                                                                                                                                                                                                                                                                                                                                                  |                                                                                                           |  |  |  |                |                  |                 |  |  |                       |           |           |          |            |            |     |             |             |             |             |             |       |             |             |               |             |            |              |                    |                    |                 |  |  |          |            |            |     |             |             |             |             |             |       |              |              |               |              |            |              |                    |                    |                  |  |  |          |            |            |     |             |             |             |             |             |       |             |             |               |              |              |              |                     |                     |                                                                                                                                                                                                                                                                                                                                                                                                                                                                                                                                                                                                                                                                                                                      |
| Crawl/kneel                                                                                                                                                                                                                                                                                                                                                                                                                      | 76.3 (15.8)                                                                                                                                                                                                                                                                                                                                                                                                                                                                                                                                                                                                                                                    | 68.4 (24.0)                                                                                                                                                                                                                                                                                                                                                                                                                                                                                                                                                                                                                                                                                                                                                                                                                                                                                                                                                                                                                                                                                                                                                                                                                                                                                                                                                                                                                                                                                                                                                                                                                                                                                                                                                                                                                                                                                                                                                                                                                                                                                                                                                                                                                                                                                                                                                                                                                                                                                                                                                                                                                                                                                                                                                                                                                                                                                                                                                                                                                                                                                                                                                                                                                                                                                                                                                                                                                                                                                                                                                                                                                                                                                                                                                                                                                                                                                                                                                                                                                                                                                                                                                                                                                                                                                                                  |                                                                                                           |  |  |  |                |                  |                 |  |  |                       |           |           |          |            |            |     |             |             |             |             |             |       |             |             |               |             |            |              |                    |                    |                 |  |  |          |            |            |     |             |             |             |             |             |       |              |              |               |              |            |              |                    |                    |                  |  |  |          |            |            |     |             |             |             |             |             |       |             |             |               |              |              |              |                     |                     |                                                                                                                                                                                                                                                                                                                                                                                                                                                                                                                                                                                                                                                                                                                      |
| Stand                                                                                                                                                                                                                                                                                                                                                                                                                            | 23.7 (12.1)*                                                                                                                                                                                                                                                                                                                                                                                                                                                                                                                                                                                                                                                   | 30.1 (23.4)*                                                                                                                                                                                                                                                                                                                                                                                                                                                                                                                                                                                                                                                                                                                                                                                                                                                                                                                                                                                                                                                                                                                                                                                                                                                                                                                                                                                                                                                                                                                                                                                                                                                                                                                                                                                                                                                                                                                                                                                                                                                                                                                                                                                                                                                                                                                                                                                                                                                                                                                                                                                                                                                                                                                                                                                                                                                                                                                                                                                                                                                                                                                                                                                                                                                                                                                                                                                                                                                                                                                                                                                                                                                                                                                                                                                                                                                                                                                                                                                                                                                                                                                                                                                                                                                                                                                 |                                                                                                           |  |  |  |                |                  |                 |  |  |                       |           |           |          |            |            |     |             |             |             |             |             |       |             |             |               |             |            |              |                    |                    |                 |  |  |          |            |            |     |             |             |             |             |             |       |              |              |               |              |            |              |                    |                    |                  |  |  |          |            |            |     |             |             |             |             |             |       |             |             |               |              |              |              |                     |                     |                                                                                                                                                                                                                                                                                                                                                                                                                                                                                                                                                                                                                                                                                                                      |
| Walk/run/jump                                                                                                                                                                                                                                                                                                                                                                                                                    | 114.5 (15.4)                                                                                                                                                                                                                                                                                                                                                                                                                                                                                                                                                                                                                                                   | 14.8 (7.8)                                                                                                                                                                                                                                                                                                                                                                                                                                                                                                                                                                                                                                                                                                                                                                                                                                                                                                                                                                                                                                                                                                                                                                                                                                                                                                                                                                                                                                                                                                                                                                                                                                                                                                                                                                                                                                                                                                                                                                                                                                                                                                                                                                                                                                                                                                                                                                                                                                                                                                                                                                                                                                                                                                                                                                                                                                                                                                                                                                                                                                                                                                                                                                                                                                                                                                                                                                                                                                                                                                                                                                                                                                                                                                                                                                                                                                                                                                                                                                                                                                                                                                                                                                                                                                                                                                                   |                                                                                                           |  |  |  |                |                  |                 |  |  |                       |           |           |          |            |            |     |             |             |             |             |             |       |             |             |               |             |            |              |                    |                    |                 |  |  |          |            |            |     |             |             |             |             |             |       |              |              |               |              |            |              |                    |                    |                  |  |  |          |            |            |     |             |             |             |             |             |       |             |             |               |              |              |              |                     |                     |                                                                                                                                                                                                                                                                                                                                                                                                                                                                                                                                                                                                                                                                                                                      |
| <b>Total</b>                                                                                                                                                                                                                                                                                                                                                                                                                     | <b>58.5 (10.7)</b>                                                                                                                                                                                                                                                                                                                                                                                                                                                                                                                                                                                                                                             | <b>58.7 (13.5)</b>                                                                                                                                                                                                                                                                                                                                                                                                                                                                                                                                                                                                                                                                                                                                                                                                                                                                                                                                                                                                                                                                                                                                                                                                                                                                                                                                                                                                                                                                                                                                                                                                                                                                                                                                                                                                                                                                                                                                                                                                                                                                                                                                                                                                                                                                                                                                                                                                                                                                                                                                                                                                                                                                                                                                                                                                                                                                                                                                                                                                                                                                                                                                                                                                                                                                                                                                                                                                                                                                                                                                                                                                                                                                                                                                                                                                                                                                                                                                                                                                                                                                                                                                                                                                                                                                                                           |                                                                                                           |  |  |  |                |                  |                 |  |  |                       |           |           |          |            |            |     |             |             |             |             |             |       |             |             |               |             |            |              |                    |                    |                 |  |  |          |            |            |     |             |             |             |             |             |       |              |              |               |              |            |              |                    |                    |                  |  |  |          |            |            |     |             |             |             |             |             |       |             |             |               |              |              |              |                     |                     |                                                                                                                                                                                                                                                                                                                                                                                                                                                                                                                                                                                                                                                                                                                      |
| <b>12 months</b>                                                                                                                                                                                                                                                                                                                                                                                                                 |                                                                                                                                                                                                                                                                                                                                                                                                                                                                                                                                                                                                                                                                |                                                                                                                                                                                                                                                                                                                                                                                                                                                                                                                                                                                                                                                                                                                                                                                                                                                                                                                                                                                                                                                                                                                                                                                                                                                                                                                                                                                                                                                                                                                                                                                                                                                                                                                                                                                                                                                                                                                                                                                                                                                                                                                                                                                                                                                                                                                                                                                                                                                                                                                                                                                                                                                                                                                                                                                                                                                                                                                                                                                                                                                                                                                                                                                                                                                                                                                                                                                                                                                                                                                                                                                                                                                                                                                                                                                                                                                                                                                                                                                                                                                                                                                                                                                                                                                                                                                              |                                                                                                           |  |  |  |                |                  |                 |  |  |                       |           |           |          |            |            |     |             |             |             |             |             |       |             |             |               |             |            |              |                    |                    |                 |  |  |          |            |            |     |             |             |             |             |             |       |              |              |               |              |            |              |                    |                    |                  |  |  |          |            |            |     |             |             |             |             |             |       |             |             |               |              |              |              |                     |                     |                                                                                                                                                                                                                                                                                                                                                                                                                                                                                                                                                                                                                                                                                                                      |
| Lie/roll                                                                                                                                                                                                                                                                                                                                                                                                                         | 96.2 (3.1)                                                                                                                                                                                                                                                                                                                                                                                                                                                                                                                                                                                                                                                     | 98.7 (1.9)                                                                                                                                                                                                                                                                                                                                                                                                                                                                                                                                                                                                                                                                                                                                                                                                                                                                                                                                                                                                                                                                                                                                                                                                                                                                                                                                                                                                                                                                                                                                                                                                                                                                                                                                                                                                                                                                                                                                                                                                                                                                                                                                                                                                                                                                                                                                                                                                                                                                                                                                                                                                                                                                                                                                                                                                                                                                                                                                                                                                                                                                                                                                                                                                                                                                                                                                                                                                                                                                                                                                                                                                                                                                                                                                                                                                                                                                                                                                                                                                                                                                                                                                                                                                                                                                                                                   |                                                                                                           |  |  |  |                |                  |                 |  |  |                       |           |           |          |            |            |     |             |             |             |             |             |       |             |             |               |             |            |              |                    |                    |                 |  |  |          |            |            |     |             |             |             |             |             |       |              |              |               |              |            |              |                    |                    |                  |  |  |          |            |            |     |             |             |             |             |             |       |             |             |               |              |              |              |                     |                     |                                                                                                                                                                                                                                                                                                                                                                                                                                                                                                                                                                                                                                                                                                                      |
| Sit                                                                                                                                                                                                                                                                                                                                                                                                                              | 87.9 (15.8)                                                                                                                                                                                                                                                                                                                                                                                                                                                                                                                                                                                                                                                    | 87.7 (15.2)                                                                                                                                                                                                                                                                                                                                                                                                                                                                                                                                                                                                                                                                                                                                                                                                                                                                                                                                                                                                                                                                                                                                                                                                                                                                                                                                                                                                                                                                                                                                                                                                                                                                                                                                                                                                                                                                                                                                                                                                                                                                                                                                                                                                                                                                                                                                                                                                                                                                                                                                                                                                                                                                                                                                                                                                                                                                                                                                                                                                                                                                                                                                                                                                                                                                                                                                                                                                                                                                                                                                                                                                                                                                                                                                                                                                                                                                                                                                                                                                                                                                                                                                                                                                                                                                                                                  |                                                                                                           |  |  |  |                |                  |                 |  |  |                       |           |           |          |            |            |     |             |             |             |             |             |       |             |             |               |             |            |              |                    |                    |                 |  |  |          |            |            |     |             |             |             |             |             |       |              |              |               |              |            |              |                    |                    |                  |  |  |          |            |            |     |             |             |             |             |             |       |             |             |               |              |              |              |                     |                     |                                                                                                                                                                                                                                                                                                                                                                                                                                                                                                                                                                                                                                                                                                                      |
| Crawl/kneel                                                                                                                                                                                                                                                                                                                                                                                                                      | 76.9 (10.4)                                                                                                                                                                                                                                                                                                                                                                                                                                                                                                                                                                                                                                                    | 77.3 (19.2)                                                                                                                                                                                                                                                                                                                                                                                                                                                                                                                                                                                                                                                                                                                                                                                                                                                                                                                                                                                                                                                                                                                                                                                                                                                                                                                                                                                                                                                                                                                                                                                                                                                                                                                                                                                                                                                                                                                                                                                                                                                                                                                                                                                                                                                                                                                                                                                                                                                                                                                                                                                                                                                                                                                                                                                                                                                                                                                                                                                                                                                                                                                                                                                                                                                                                                                                                                                                                                                                                                                                                                                                                                                                                                                                                                                                                                                                                                                                                                                                                                                                                                                                                                                                                                                                                                                  |                                                                                                           |  |  |  |                |                  |                 |  |  |                       |           |           |          |            |            |     |             |             |             |             |             |       |             |             |               |             |            |              |                    |                    |                 |  |  |          |            |            |     |             |             |             |             |             |       |              |              |               |              |            |              |                    |                    |                  |  |  |          |            |            |     |             |             |             |             |             |       |             |             |               |              |              |              |                     |                     |                                                                                                                                                                                                                                                                                                                                                                                                                                                                                                                                                                                                                                                                                                                      |
| Stand                                                                                                                                                                                                                                                                                                                                                                                                                            | 27.1 (19.6)                                                                                                                                                                                                                                                                                                                                                                                                                                                                                                                                                                                                                                                    | 33.1 (23.5)                                                                                                                                                                                                                                                                                                                                                                                                                                                                                                                                                                                                                                                                                                                                                                                                                                                                                                                                                                                                                                                                                                                                                                                                                                                                                                                                                                                                                                                                                                                                                                                                                                                                                                                                                                                                                                                                                                                                                                                                                                                                                                                                                                                                                                                                                                                                                                                                                                                                                                                                                                                                                                                                                                                                                                                                                                                                                                                                                                                                                                                                                                                                                                                                                                                                                                                                                                                                                                                                                                                                                                                                                                                                                                                                                                                                                                                                                                                                                                                                                                                                                                                                                                                                                                                                                                                  |                                                                                                           |  |  |  |                |                  |                 |  |  |                       |           |           |          |            |            |     |             |             |             |             |             |       |             |             |               |             |            |              |                    |                    |                 |  |  |          |            |            |     |             |             |             |             |             |       |              |              |               |              |            |              |                    |                    |                  |  |  |          |            |            |     |             |             |             |             |             |       |             |             |               |              |              |              |                     |                     |                                                                                                                                                                                                                                                                                                                                                                                                                                                                                                                                                                                                                                                                                                                      |
| Walk/run/jump                                                                                                                                                                                                                                                                                                                                                                                                                    | 15.7 (17.1)*                                                                                                                                                                                                                                                                                                                                                                                                                                                                                                                                                                                                                                                   | 23.4 (19.5)*                                                                                                                                                                                                                                                                                                                                                                                                                                                                                                                                                                                                                                                                                                                                                                                                                                                                                                                                                                                                                                                                                                                                                                                                                                                                                                                                                                                                                                                                                                                                                                                                                                                                                                                                                                                                                                                                                                                                                                                                                                                                                                                                                                                                                                                                                                                                                                                                                                                                                                                                                                                                                                                                                                                                                                                                                                                                                                                                                                                                                                                                                                                                                                                                                                                                                                                                                                                                                                                                                                                                                                                                                                                                                                                                                                                                                                                                                                                                                                                                                                                                                                                                                                                                                                                                                                                 |                                                                                                           |  |  |  |                |                  |                 |  |  |                       |           |           |          |            |            |     |             |             |             |             |             |       |             |             |               |             |            |              |                    |                    |                 |  |  |          |            |            |     |             |             |             |             |             |       |              |              |               |              |            |              |                    |                    |                  |  |  |          |            |            |     |             |             |             |             |             |       |             |             |               |              |              |              |                     |                     |                                                                                                                                                                                                                                                                                                                                                                                                                                                                                                                                                                                                                                                                                                                      |
| <b>Total</b>                                                                                                                                                                                                                                                                                                                                                                                                                     | <b>60.9 (12.5)*</b>                                                                                                                                                                                                                                                                                                                                                                                                                                                                                                                                                                                                                                            | <b>64.0 (13.2)*</b>                                                                                                                                                                                                                                                                                                                                                                                                                                                                                                                                                                                                                                                                                                                                                                                                                                                                                                                                                                                                                                                                                                                                                                                                                                                                                                                                                                                                                                                                                                                                                                                                                                                                                                                                                                                                                                                                                                                                                                                                                                                                                                                                                                                                                                                                                                                                                                                                                                                                                                                                                                                                                                                                                                                                                                                                                                                                                                                                                                                                                                                                                                                                                                                                                                                                                                                                                                                                                                                                                                                                                                                                                                                                                                                                                                                                                                                                                                                                                                                                                                                                                                                                                                                                                                                                                                          |                                                                                                           |  |  |  |                |                  |                 |  |  |                       |           |           |          |            |            |     |             |             |             |             |             |       |             |             |               |             |            |              |                    |                    |                 |  |  |          |            |            |     |             |             |             |             |             |       |              |              |               |              |            |              |                    |                    |                  |  |  |          |            |            |     |             |             |             |             |             |       |             |             |               |              |              |              |                     |                     |                                                                                                                                                                                                                                                                                                                                                                                                                                                                                                                                                                                                                                                                                                                      |

| Reference & Study details | Overview/Methodologies                                                                                                                                                                                                                                                                                    | Key efficacy and safety findings | Comments                                                                                                                                                                                                                                                                                                                                                                                                                                                                                                                                                                                                                                                                                                                          |
|---------------------------|-----------------------------------------------------------------------------------------------------------------------------------------------------------------------------------------------------------------------------------------------------------------------------------------------------------|----------------------------------|-----------------------------------------------------------------------------------------------------------------------------------------------------------------------------------------------------------------------------------------------------------------------------------------------------------------------------------------------------------------------------------------------------------------------------------------------------------------------------------------------------------------------------------------------------------------------------------------------------------------------------------------------------------------------------------------------------------------------------------|
|                           | <ul style="list-style-type: none"> <li>• Patients received intravenous morphine and a urinary catheter for approximately 3 to 4 days' post-surgery. Patients were turned from side to side every 4 hours during this time.</li> <li>• Physiotherapy began on the 2nd or 3rd day after surgery.</li> </ul> |                                  | <p><i>'received two therapy sessions per week (approximately 120 minutes in total)' while for the SDR group during their 6-week post-operative stay 'each child received a 45-minute PT [physiotherapy] session daily and a 45 minute OT [occupational therapy] session twice weekly'.</i></p> <ul style="list-style-type: none"> <li>• The authors state that as per Russell et al's 1989<sup>11</sup> guidelines, a 6 percentage point improvement in the total score or within a dimension was considered clinically important. However, we have been unable to identify where the 6-percentage point improvement in GMFM-88 total or domain score is stated as clinically meaningful within Russell et al's study.</li> </ul> |

| Reference & Study details                                                                                                                                                                                                                                                                                                                                                                                                                                                                    | Overview/Methodologies                                                                                                                                                                                                                                                                                                                                                                                                                                                                                                                                                                                           | Key efficacy and safety findings                                                                                                                                                                                                                                                                                                                                                                                                                                                                                                                                                                                                                                                                                                                                                                                                                                                                                                                                                                                                                                                                                                                                                                                                                                                                                                                                                                                                                                                                                                                                                                                                                                                                                                                                                                                                                                                                    | Comments                       |  |  |  |  |                         |                       |                      |              |    |    |    |                   |   |    |    |                                           |                |                |                |                                       |                |               |               |                                         |  |  |  |  |               |                |         |          |       |      |         |                                                                                                                                                                                                                                                                                                                                                                                                                                                                                                                                                                                                                                                                                                                              |
|----------------------------------------------------------------------------------------------------------------------------------------------------------------------------------------------------------------------------------------------------------------------------------------------------------------------------------------------------------------------------------------------------------------------------------------------------------------------------------------------|------------------------------------------------------------------------------------------------------------------------------------------------------------------------------------------------------------------------------------------------------------------------------------------------------------------------------------------------------------------------------------------------------------------------------------------------------------------------------------------------------------------------------------------------------------------------------------------------------------------|-----------------------------------------------------------------------------------------------------------------------------------------------------------------------------------------------------------------------------------------------------------------------------------------------------------------------------------------------------------------------------------------------------------------------------------------------------------------------------------------------------------------------------------------------------------------------------------------------------------------------------------------------------------------------------------------------------------------------------------------------------------------------------------------------------------------------------------------------------------------------------------------------------------------------------------------------------------------------------------------------------------------------------------------------------------------------------------------------------------------------------------------------------------------------------------------------------------------------------------------------------------------------------------------------------------------------------------------------------------------------------------------------------------------------------------------------------------------------------------------------------------------------------------------------------------------------------------------------------------------------------------------------------------------------------------------------------------------------------------------------------------------------------------------------------------------------------------------------------------------------------------------------------|--------------------------------|--|--|--|--|-------------------------|-----------------------|----------------------|--------------|----|----|----|-------------------|---|----|----|-------------------------------------------|----------------|----------------|----------------|---------------------------------------|----------------|---------------|---------------|-----------------------------------------|--|--|--|--|---------------|----------------|---------|----------|-------|------|---------|------------------------------------------------------------------------------------------------------------------------------------------------------------------------------------------------------------------------------------------------------------------------------------------------------------------------------------------------------------------------------------------------------------------------------------------------------------------------------------------------------------------------------------------------------------------------------------------------------------------------------------------------------------------------------------------------------------------------------|
| <p>McLaughlin et al. (2002)<sup>1</sup></p> <p>Note: All three papers selected for this meta-analysis have been included in this review.</p> <ul style="list-style-type: none"> <li>• Meta-analysis of three RCTs.</li> <li>• The three RCTs consist of Steinbok et al. (1997) (Vancouver), McLaughlin et al. (1998)<sup>8</sup> (Seattle), and Wright et al. (1998)<sup>10</sup> (Toronto).</li> <li>• All three studies from Northern America.</li> <li>• n=90 from three RCTs.</li> </ul> | <ul style="list-style-type: none"> <li>• Children with spastic diplegia received either 'selective' dorsal rhizotomy (SDR) plus physiotherapy (PT) (SDR+PT) or PT without SDR (PT-only).</li> <li>• Assessments made at baseline, 3, 6, 9, 12 and 24 months.</li> <li>• Common outcome measures were used for spasticity (modified Ashworth scale) and function (Gross Motor Function Measure [GMFM]).</li> <li>• Baseline and 9- to 12-month outcome data were pooled (n=90).</li> <li>• Regression analysis of modified Ashworth, GMFM-66, GMFM-88 change score by % dorsal root tissue transected.</li> </ul> | <ul style="list-style-type: none"> <li>• Pooled GMFM data revealed greater functional improvement with SDR+PT (difference in change score +4.0, p=0.008).</li> <li>• Multivariable analysis in the SDR+PT group revealed a direct relationship between percentage of dorsal root tissue transected and functional improvement.</li> <li>• The authors stated that <i>'the results suggest that the decision whether or not to perform SDR on a similar child partly rests on whether or not an anticipated mean GMFM change score increment of 4 percentage points above the amount of change with non-invasive care justifies the time, effort, and risk'</i>.</li> <li>• Below table gives SDR RCT trial outcome summary:</li> </ul> <table border="1" data-bbox="954 671 1666 1070"> <thead> <tr> <th colspan="4">SDR RCT trial: outcome summary</th> </tr> <tr> <th></th> <th>Vancouver<sup>12</sup></th> <th>Toronto<sup>10</sup></th> <th>Seattle<sup>8</sup></th> </tr> </thead> <tbody> <tr> <td>Children (n)</td> <td>28</td> <td>24</td> <td>38</td> </tr> <tr> <td>Interval (months)</td> <td>9</td> <td>12</td> <td>24</td> </tr> <tr> <td>Mean difference in Ashworth change scores</td> <td>-1.1 (p&lt;0.001)</td> <td>-1.0 (p=0.002)</td> <td>-1.0 (p=0.001)</td> </tr> <tr> <td>Mean difference in GMFM change scores</td> <td>6.1% (p=0.007)</td> <td>7.7% (p=0.02)</td> <td>0.2% (p=0.94)</td> </tr> </tbody> </table> <ul style="list-style-type: none"> <li>• The table below gives the main multivariable analysis results:</li> </ul> <table border="1" data-bbox="954 1179 1469 1358"> <thead> <tr> <th colspan="4">SDR multivariate analysis: main results</th> </tr> <tr> <th></th> <th>Change Scores</th> <th>Standard error</th> <th>p-value</th> </tr> </thead> <tbody> <tr> <td>Ashworth</td> <td>-1.23</td> <td>0.11</td> <td>p&lt;0.001</td> </tr> </tbody> </table> | SDR RCT trial: outcome summary |  |  |  |  | Vancouver <sup>12</sup> | Toronto <sup>10</sup> | Seattle <sup>8</sup> | Children (n) | 28 | 24 | 38 | Interval (months) | 9 | 12 | 24 | Mean difference in Ashworth change scores | -1.1 (p<0.001) | -1.0 (p=0.002) | -1.0 (p=0.001) | Mean difference in GMFM change scores | 6.1% (p=0.007) | 7.7% (p=0.02) | 0.2% (p=0.94) | SDR multivariate analysis: main results |  |  |  |  | Change Scores | Standard error | p-value | Ashworth | -1.23 | 0.11 | p<0.001 | <ul style="list-style-type: none"> <li>• Used individual patient data (IPD).</li> <li>• Unclear if random or fixed effect modelling used.</li> <li>• All three studies included were based in Northern America.</li> <li>• Adverse events not listed, and only comment is in discussion.</li> <li>• Included studies with different follow-up timepoints (two at 12 months and one at 9 months).</li> <li>• Authors appear to have muddled the terms <i>'multivariate'</i> and <i>'multivariable'</i>. Despite stating <i>'multivariate'</i>, we believe they mean <i>'multivariable'</i>.</li> <li>• Gives comparator table for physiotherapy protocols for both intervention and control groups across studies.</li> </ul> |
| SDR RCT trial: outcome summary                                                                                                                                                                                                                                                                                                                                                                                                                                                               |                                                                                                                                                                                                                                                                                                                                                                                                                                                                                                                                                                                                                  |                                                                                                                                                                                                                                                                                                                                                                                                                                                                                                                                                                                                                                                                                                                                                                                                                                                                                                                                                                                                                                                                                                                                                                                                                                                                                                                                                                                                                                                                                                                                                                                                                                                                                                                                                                                                                                                                                                     |                                |  |  |  |  |                         |                       |                      |              |    |    |    |                   |   |    |    |                                           |                |                |                |                                       |                |               |               |                                         |  |  |  |  |               |                |         |          |       |      |         |                                                                                                                                                                                                                                                                                                                                                                                                                                                                                                                                                                                                                                                                                                                              |
|                                                                                                                                                                                                                                                                                                                                                                                                                                                                                              | Vancouver <sup>12</sup>                                                                                                                                                                                                                                                                                                                                                                                                                                                                                                                                                                                          | Toronto <sup>10</sup>                                                                                                                                                                                                                                                                                                                                                                                                                                                                                                                                                                                                                                                                                                                                                                                                                                                                                                                                                                                                                                                                                                                                                                                                                                                                                                                                                                                                                                                                                                                                                                                                                                                                                                                                                                                                                                                                               | Seattle <sup>8</sup>           |  |  |  |  |                         |                       |                      |              |    |    |    |                   |   |    |    |                                           |                |                |                |                                       |                |               |               |                                         |  |  |  |  |               |                |         |          |       |      |         |                                                                                                                                                                                                                                                                                                                                                                                                                                                                                                                                                                                                                                                                                                                              |
| Children (n)                                                                                                                                                                                                                                                                                                                                                                                                                                                                                 | 28                                                                                                                                                                                                                                                                                                                                                                                                                                                                                                                                                                                                               | 24                                                                                                                                                                                                                                                                                                                                                                                                                                                                                                                                                                                                                                                                                                                                                                                                                                                                                                                                                                                                                                                                                                                                                                                                                                                                                                                                                                                                                                                                                                                                                                                                                                                                                                                                                                                                                                                                                                  | 38                             |  |  |  |  |                         |                       |                      |              |    |    |    |                   |   |    |    |                                           |                |                |                |                                       |                |               |               |                                         |  |  |  |  |               |                |         |          |       |      |         |                                                                                                                                                                                                                                                                                                                                                                                                                                                                                                                                                                                                                                                                                                                              |
| Interval (months)                                                                                                                                                                                                                                                                                                                                                                                                                                                                            | 9                                                                                                                                                                                                                                                                                                                                                                                                                                                                                                                                                                                                                | 12                                                                                                                                                                                                                                                                                                                                                                                                                                                                                                                                                                                                                                                                                                                                                                                                                                                                                                                                                                                                                                                                                                                                                                                                                                                                                                                                                                                                                                                                                                                                                                                                                                                                                                                                                                                                                                                                                                  | 24                             |  |  |  |  |                         |                       |                      |              |    |    |    |                   |   |    |    |                                           |                |                |                |                                       |                |               |               |                                         |  |  |  |  |               |                |         |          |       |      |         |                                                                                                                                                                                                                                                                                                                                                                                                                                                                                                                                                                                                                                                                                                                              |
| Mean difference in Ashworth change scores                                                                                                                                                                                                                                                                                                                                                                                                                                                    | -1.1 (p<0.001)                                                                                                                                                                                                                                                                                                                                                                                                                                                                                                                                                                                                   | -1.0 (p=0.002)                                                                                                                                                                                                                                                                                                                                                                                                                                                                                                                                                                                                                                                                                                                                                                                                                                                                                                                                                                                                                                                                                                                                                                                                                                                                                                                                                                                                                                                                                                                                                                                                                                                                                                                                                                                                                                                                                      | -1.0 (p=0.001)                 |  |  |  |  |                         |                       |                      |              |    |    |    |                   |   |    |    |                                           |                |                |                |                                       |                |               |               |                                         |  |  |  |  |               |                |         |          |       |      |         |                                                                                                                                                                                                                                                                                                                                                                                                                                                                                                                                                                                                                                                                                                                              |
| Mean difference in GMFM change scores                                                                                                                                                                                                                                                                                                                                                                                                                                                        | 6.1% (p=0.007)                                                                                                                                                                                                                                                                                                                                                                                                                                                                                                                                                                                                   | 7.7% (p=0.02)                                                                                                                                                                                                                                                                                                                                                                                                                                                                                                                                                                                                                                                                                                                                                                                                                                                                                                                                                                                                                                                                                                                                                                                                                                                                                                                                                                                                                                                                                                                                                                                                                                                                                                                                                                                                                                                                                       | 0.2% (p=0.94)                  |  |  |  |  |                         |                       |                      |              |    |    |    |                   |   |    |    |                                           |                |                |                |                                       |                |               |               |                                         |  |  |  |  |               |                |         |          |       |      |         |                                                                                                                                                                                                                                                                                                                                                                                                                                                                                                                                                                                                                                                                                                                              |
| SDR multivariate analysis: main results                                                                                                                                                                                                                                                                                                                                                                                                                                                      |                                                                                                                                                                                                                                                                                                                                                                                                                                                                                                                                                                                                                  |                                                                                                                                                                                                                                                                                                                                                                                                                                                                                                                                                                                                                                                                                                                                                                                                                                                                                                                                                                                                                                                                                                                                                                                                                                                                                                                                                                                                                                                                                                                                                                                                                                                                                                                                                                                                                                                                                                     |                                |  |  |  |  |                         |                       |                      |              |    |    |    |                   |   |    |    |                                           |                |                |                |                                       |                |               |               |                                         |  |  |  |  |               |                |         |          |       |      |         |                                                                                                                                                                                                                                                                                                                                                                                                                                                                                                                                                                                                                                                                                                                              |
|                                                                                                                                                                                                                                                                                                                                                                                                                                                                                              | Change Scores                                                                                                                                                                                                                                                                                                                                                                                                                                                                                                                                                                                                    | Standard error                                                                                                                                                                                                                                                                                                                                                                                                                                                                                                                                                                                                                                                                                                                                                                                                                                                                                                                                                                                                                                                                                                                                                                                                                                                                                                                                                                                                                                                                                                                                                                                                                                                                                                                                                                                                                                                                                      | p-value                        |  |  |  |  |                         |                       |                      |              |    |    |    |                   |   |    |    |                                           |                |                |                |                                       |                |               |               |                                         |  |  |  |  |               |                |         |          |       |      |         |                                                                                                                                                                                                                                                                                                                                                                                                                                                                                                                                                                                                                                                                                                                              |
| Ashworth                                                                                                                                                                                                                                                                                                                                                                                                                                                                                     | -1.23                                                                                                                                                                                                                                                                                                                                                                                                                                                                                                                                                                                                            | 0.11                                                                                                                                                                                                                                                                                                                                                                                                                                                                                                                                                                                                                                                                                                                                                                                                                                                                                                                                                                                                                                                                                                                                                                                                                                                                                                                                                                                                                                                                                                                                                                                                                                                                                                                                                                                                                                                                                                | p<0.001                        |  |  |  |  |                         |                       |                      |              |    |    |    |                   |   |    |    |                                           |                |                |                |                                       |                |               |               |                                         |  |  |  |  |               |                |         |          |       |      |         |                                                                                                                                                                                                                                                                                                                                                                                                                                                                                                                                                                                                                                                                                                                              |

| Reference & Study details | Overview/Methodologies | Key efficacy and safety findings |         |                                                                                                                                                                                                                                                                                                                                                                                                                                                                                                                                                                                                                                                                                                                                                                             |         | Comments                                                                                                                                                                                                                                                                                                                                                                                                                                                                                                                                                                                                                                                                                                                                            |
|---------------------------|------------------------|----------------------------------|---------|-----------------------------------------------------------------------------------------------------------------------------------------------------------------------------------------------------------------------------------------------------------------------------------------------------------------------------------------------------------------------------------------------------------------------------------------------------------------------------------------------------------------------------------------------------------------------------------------------------------------------------------------------------------------------------------------------------------------------------------------------------------------------------|---------|-----------------------------------------------------------------------------------------------------------------------------------------------------------------------------------------------------------------------------------------------------------------------------------------------------------------------------------------------------------------------------------------------------------------------------------------------------------------------------------------------------------------------------------------------------------------------------------------------------------------------------------------------------------------------------------------------------------------------------------------------------|
|                           |                        | GMFM-88                          | 4.53    | 1.44                                                                                                                                                                                                                                                                                                                                                                                                                                                                                                                                                                                                                                                                                                                                                                        | p=0.002 | <ul style="list-style-type: none"> <li>• Reports both GMFM-88 and GMFM-66 scores. Details of the calculation of the GMFM-66 scores are not described fully.</li> <li>• Assigned GMFCS levels to children retrospectively based on clinical notes.</li> <li>• No assessment of risk of bias.</li> <li>• The authors state that the modified Ashworth scale was used, however, the Wright et al. (1998)<sup>10</sup> reported the Ashworth scale score.</li> <li>• The Modified Ashworth Scale is incorrectly referred to as the Ashworth scale for Steinbok's et al.<sup>9</sup> study.</li> <li>• McLaughlin et al. states the Ashworth scale is used as a primary outcome for all three studies, however in all the original papers the</li> </ul> |
| GMFM-66                   | 2.66                   | 0.82                             | p=0.002 | <ul style="list-style-type: none"> <li>• <i>'Based on the lack of interactional effects in the multivariate model, no subgroup defined by baseline characteristics was identified for which SDR is particularly effective. This was confirmed by looking at mean effects within and across sites in subgroups defined posthoc (analysis not presented). Retrospective GMFCS classification of baseline severity was not related to outcome'.</i></li> <li>• Authors concluded that <i>'SDR+PT is efficacious in reducing spasticity in children with spastic diplegia and has a small positive effect on gross motor function'.</i></li> <li>• Authors state that <i>'the three original studies did not report any worrisome problems with adverse events'.</i></li> </ul> |         |                                                                                                                                                                                                                                                                                                                                                                                                                                                                                                                                                                                                                                                                                                                                                     |

| Reference & Study details | Overview/Methodologies | Key efficacy and safety findings | Comments                                                                                                                                                                                                                                                                                                                                                                                                                                                                                                                                                                                                                                                                                                               |
|---------------------------|------------------------|----------------------------------|------------------------------------------------------------------------------------------------------------------------------------------------------------------------------------------------------------------------------------------------------------------------------------------------------------------------------------------------------------------------------------------------------------------------------------------------------------------------------------------------------------------------------------------------------------------------------------------------------------------------------------------------------------------------------------------------------------------------|
|                           |                        |                                  | <p>Ashworth/MAS is used as a secondary outcome.</p> <ul style="list-style-type: none"> <li>• The Ashworth/MAS scale is treated as continuous in Table VII as it is analysed using ANOVA, however in Figure 1 it is analysed using Wilcoxon's test, which is used for data which has some form of ordering as it can be ranked. Furthermore, if MAS was indeed used, the coding for the 1+ category should have been stated.</li> <li>• It is unclear whether backwards elimination has been performed correctly, or whether forwards selection has instead been performed. The following quote suggest that the authors have performed forward selection, as opposed to backwards elimination: '<i>Once</i></li> </ul> |



| Reference & Study details | Overview/Methodologies | Key efficacy and safety findings | Comments                                                                                                                                                                                                                                                                                                                                                                                                                                                                                                                                                                                                                                                                         |
|---------------------------|------------------------|----------------------------------|----------------------------------------------------------------------------------------------------------------------------------------------------------------------------------------------------------------------------------------------------------------------------------------------------------------------------------------------------------------------------------------------------------------------------------------------------------------------------------------------------------------------------------------------------------------------------------------------------------------------------------------------------------------------------------|
|                           |                        |                                  | <p><i>significant main effects were identified, two-way interactions among the included variables were evaluated.'</i></p> <p>While stepwise methods are commonly used there are problems with using them such as preventing the investigator from really thinking about the problem for example, as Copas and Long (1991)<sup>13</sup> are quoted by Harrell<sup>14</sup>:<br/> <i>'The choice of the variables to be included depends on estimated regression coefficients rather than their true values, and so <math>X_j</math> is more likely to be included if its regression coefficient is over-estimated than if its regression coefficient is underestimated'.</i></p> |

We identified one review/meta-analysis of randomized controlled clinical trials<sup>1</sup> and three randomized controlled trial,<sup>8-10</sup> each of which had contributed to the identified meta-analysis reported within the review. The review was published in 2002 and was conducted prior to publication of the PRISMA publication standard. It did not report its search strategy and did not include a PRISMA flow chart. It is thus unclear whether it strictly meets the definition of a systematic review. The review included an individual patient data (IPD) meta-analysis but since this was conducted prior to the publication of the PRISMA-IPD statement, there was no statement in relation to statistical assessment of heterogeneity and no statement in relation to the use of fixed or random effects. The review had not conducted any risk of bias assessment of the contributing studies although there were statements within the review indicating that some of these aspects had been considered.

We used the Cochrane risk of bias tool to assess the three RCT studies<sup>8-10</sup> and found that in general they were well reported and had included fairly robust methods of randomization and allocation concealment (Figure S7). None of the three studies were clinician-patient masked but given the nature of the intervention under consideration this is unsurprising but nevertheless does have the ability to bias findings. All three studies had attempted to address this by using strict methods to ensure that the outcome assessment was done without knowledge of treatment assignment although one paper reported that it was clear to assessors which children had received surgery.

|                 | Random sequence generation (selection bias) | Allocation concealment (selection bias) | Blinding of participants and personnel (performance bias) | Blinding of outcome assessment (detection bias) | Incomplete outcome data (attrition bias) | Selective reporting (reporting bias) | Other bias |
|-----------------|---------------------------------------------|-----------------------------------------|-----------------------------------------------------------|-------------------------------------------------|------------------------------------------|--------------------------------------|------------|
| McLaughlin 1998 | +                                           | +                                       | -                                                         | +                                               | +                                        |                                      |            |
| Steinbok 1997   | +                                           | +                                       | -                                                         | +                                               | +                                        |                                      |            |
| Wright 1998     | +                                           | +                                       | -                                                         | ?                                               | +                                        |                                      |            |

Figure S7: Cochrane risk of bias

We note that there are currently (as of October 2018) two systematic reviews registered with PROSPERO (International Prospective Register of Systematic Reviews, <https://www.crd.york.ac.uk/prospero/>) related to SDR. The first, due to be completed by the end of 2019, is investigating the long-term outcomes in children who undergo SDR ([https://www.crd.york.ac.uk/prospero/display\\_record.php?RecordID=93544](https://www.crd.york.ac.uk/prospero/display_record.php?RecordID=93544)). The second is investigating both short and long-term outcomes following SDR in relation to gross motor function ([https://www.crd.york.ac.uk/prospero/display\\_record.php?RecordID=91236](https://www.crd.york.ac.uk/prospero/display_record.php?RecordID=91236)).

We did not conduct a meta-analysis of the three RCT studies that were identified because none reported GMFM-66 and due to issues regarding the comparability of the study setting such as assessment timepoints, differing age cohorts and differences in baseline characteristics between the studies. For example, Steinbok et al. (1997)<sup>9</sup> and Wright et al.

(1998)<sup>10</sup> report a study population with lower GMFM scores at baseline in comparison to McLaughlin et al. 1998<sup>8</sup> and all three RCTs use different timepoints for assessments.

McLaughlin et al's (2002) review conducted additional analyses using raw data and used this to calculate the scores for GMFM-66 for the three RCTs listed above.<sup>1</sup> For this reason, we are reporting this review as the most up to date summary of available evidence and would highlight their findings. Included below for thoroughness, the original trial results for GMFM-88 and the GMFM-66 which is of relevance (Tables S6 and S7):

**Table S6: McLaughlin et al. (2002)<sup>1</sup> outcome summary**

| <b>SDR RCT trial: outcome summary</b>    |                               |                             |                            |
|------------------------------------------|-------------------------------|-----------------------------|----------------------------|
|                                          | <b>Vancouver<sup>12</sup></b> | <b>Toronto<sup>10</sup></b> | <b>Seattle<sup>8</sup></b> |
| Children (n)                             | 28                            | 24                          | 38                         |
| Interval (months)                        | 9                             | 12                          | 24                         |
| Mean difference in GMFM-88 change scores | 6.1% (p=0.007)                | 7.7% (p=0.02)               | 0.2% (p=0.94)              |

**Table S7: McLaughlin et al. (2002)<sup>1</sup> main results**

| <b>SDR multivariate analysis: main results*</b> |                      |                       |                |          |
|-------------------------------------------------|----------------------|-----------------------|----------------|----------|
|                                                 | <b>Change scores</b> | <b>Standard error</b> | <b>Anova F</b> | <b>p</b> |
| GMFM-88                                         | 4.53                 | 1.44                  | 9.92           | 0.002    |
| GMFM-66                                         | 2.66                 | 0.82                  | 10.53          | 0.002    |

\* 12 months' data used from Toronto and Seattle, and the 9-month data from Vancouver was used.

## References

1. McLaughlin JF, Bjornson KF, Steinbok P, et al., Selective Dorsal Rhizotomy: meta-analysis of three randomized controlled trials. *Dev Med Child Neurol*, 2002. **44**: p. 17-25.
2. National Health Service England: Commissioning Board, Clinical Commissioning Policy Statement: Selective Dorsal Rhizotomy (SDR): Reference: NHSCB/E09/PS/a. 2013: United Kingdom.
3. Reimers J and Poulsen S, Adductor transfer versus tenotomy for stability of the hip in spastic cerebral palsy. *J Pediatr Orthop*, 1984. **4**(1): p. 52-54.
4. National Institute for Health and Care Excellence, Interventional Procedures Programme: Interventional procedure overview of selective dorsal rhizotomy for spasticity in cerebral palsy. 2006: Manchester, United Kingdom.
5. Moher D, Liberati A, Tetzlaff J, et al., Preferred Reporting Items for Systematic Reviews and Meta-Analyses: The PRISMA Statement. *PLOS Medicine*, 2009. **6**(7): p. e1000097.
6. Jann B, Customizing Stata graphs made even easier, in University of Bern Social Sciences Working Papers. 2018, University of Bern: Department of Social Sciences.
7. Russell DJ, Rosenbaum PL, Wright M, and Avery LM, Gross Motor Function measure (GMFM-66 & GMFM-88) User's Manual. 2nd Edition. Clinics in Developmental Medicine, ed. C. CanChild Centre for Childhood Disability Research. 2013, Canada: MacKeith Press.
8. McLaughlin JF, Bjornson KF, Astley SJ, et al., Selective Dorsal Rhizotomy: efficacy and safety in an investigator-masked randomized clinical trial. *Dev Med Child Neurol*, 1998. **40**: p. 220-232.
9. Steinbok P, Reiner AM, Beauchamp R, et al., A randomized clinical trial to compare posterior rhizotomy plus physiotherapy with physiotherapy alone in children with spastic diplegic cerebral palsy. *Dev Med Child Neurol*, 1997. **39**: p. 178-184.
10. Wright FV, Sheil EMH, Drake JM, et al., Evaluation of selective dorsal rhizotomy for the reduction of spasticity in cerebral palsy: a randomized controlled trial. *Dev Med Child Neurol*, 1998. **40**: p. 239-247.
11. Russell DJ, Rosenbaum PL, Cadman DT, et al., The gross motor function measure: a means to evaluate the effects of physical therapy. *Dev Med Child Neurol*, 1989. **31**(3): p. 341-352.
12. Steinbok P, Reiner A, and Kestle JRW, Therapeutic electrical stimulation following selective posterior rhizotomy in children with spastic diplegic cerebral palsy: a randomized clinical trial. *Dev Med Child Neurol*, 1997. **39**(5): p. 515-520.
13. Copas, J.B. and T. Long, Estimating the Residual Variance in Orthogonal Regression with Variable Selection. *Journal of the Royal Statistical Society. Series D (The Statistician)*, 1991. **40**(1): p. 51-59.
14. Harrell, F.E., *Regression Modeling Strategies With Applications to Linear Models, Logistic Regression, and Survival Analysis*. 2001, New York, USA: Springer.
